1           **MicroRNA-27a is essential for bone remodeling by**  
2           **modulating p62-mediated osteoclast signaling**

3  
4  
5  
6  
7  
8  
9  
10       Shumin Wang<sup>1</sup>, Eri O Maruyama<sup>2</sup>, John Martinez<sup>1</sup>, Trunee Hsu<sup>6</sup>, Wencheng  
11           Wu<sup>1</sup>, Wei Hsu<sup>1,2,3,4,5,\*</sup> and Takamitsu Maruyama<sup>1,2,\*</sup>

12  
13  
14  
15  
16  
17  
18       <sup>1</sup>University of Rochester Medical Center, 601 Elmwood Avenue, Rochester, NY 14642

19       <sup>2</sup>The Forsyth Institute, <sup>3</sup>Faculty of Medicine of Harvard University, <sup>4</sup>Harvard School of  
20       Dental Medicine, <sup>5</sup>Harvard Stem Cell Institute, 245 First Street, Cambridge, MA 02142

21       <sup>6</sup>Case Western Reserve University, 10900 Euclid Avenue, Cleveland, OH 44106,  
22

23  
24  
25  
26  
27  
28  
29  
30       Running title: miR-27a in bone remodeling

31  
32  
33  
34  
35       \*Corresponding Authors

36       Phone 617-892-8297

37       Email [whsu@forsyth.org](mailto:whsu@forsyth.org); [wei.hsu@hsdm.harvard.edu](mailto:wei.hsu@hsdm.harvard.edu); [tmaruyama@forsyth.org](mailto:tmaruyama@forsyth.org)

38

39 **Author contributions:** S.W., T.M. and W.H. conceived and designed the experiments,  
40 and wrote the paper. S.W., E.O.M, J.M., T.H., W.W. T.M., and W.H performed the  
41 experiments and analyzed the data. W.W. contributed new analytic tools. T.M. and  
42 W.H. obtained research funding.

43

44 **Competing interest statement:** The authors declare no competing financial interests.

45

46 **Keywords:** miRNA-23a cluster; osteoporosis; bone homeostasis; skeletal remodeling;  
47 skeleton; osteoclast; osteoblast; bone formation; bone resorption; CRISPR/Cas9 gene-  
48 editing

49

50

51 **Abstract**

52           The ability to simultaneously modulate a set of genes for lineage-specific  
53 development has made microRNA an ideal master regulator for organogenesis.  
54 However, most microRNA deletions do not exhibit obvious phenotypic defects possibly  
55 due to functional redundancy. MicroRNAs are known to regulate skeletal lineages as the  
56 loss of their maturation enzyme Dicer impairs bone remodeling processes. Therefore, it  
57 is important to identify specific microRNA essential for bone homeostasis. We report the  
58 loss of miR-27a causing severe osteoporosis in mice. MiR-27a affects osteoclast-  
59 mediated bone resorption but not osteoblast-mediated bone formation during skeletal  
60 remodeling. Gene profiling and bioinformatics further identify the specific targets of  
61 miR-27a in osteoclast cells. MiR-27a exerts its effects on osteoclast differentiation  
62 through modulation of Sqstm1/p62 whose mutations have been linked to Paget's disease  
63 of bone. Our findings reveal a new miR-27a-p62 axis necessary and sufficient to mediate  
64 osteoclast differentiation and highlight a therapeutic implication for osteoporosis.  
65

## 66 **Introduction**

67           MicroRNA (miRNA) is a small non-coding RNA, base-pairing with  
68 complementary sequences of messenger (mRNA) to control gene expression at post-  
69 transcriptional and translational levels<sup>1,2</sup>. In animals, miRNA recognizes the 3'  
70 untranslated region of their targets via a small stretch of seed sequences. A single  
71 miRNA may simultaneously affect the expression of hundreds of genes<sup>3,4</sup>. Because of  
72 its potential to modulate the same biological process at various steps, miRNA has been  
73 postulated to function as a master regulator for organogenesis<sup>5,6</sup>, similar to the  
74 transcription factor capable of turning on a set of genes for lineage-specific development.  
75 However, possibly due to functional redundancy, most of the miRNA deletions do not  
76 cause phenotypic alterations<sup>7,8</sup>. With only limited evidence<sup>9,10</sup>, it has been difficult to  
77 prove this concept.

78           The skeleton is constantly remodeled to maintain a healthy structure after its  
79 formation<sup>11</sup>. This lifelong process is called bone remodeling in which old bone is  
80 removed from the skeleton, followed by replaced with new bone. Therefore, a balance of  
81 osteoclast-mediated bone resorption and osteoblast-mediated bone formation is essential  
82 for bone metabolism<sup>11</sup>. Dysregulation of bone remodeling causes metabolic disorders,  
83 e.g. osteopetrosis, osteoporosis, and Paget's disease<sup>12</sup>. The current treatments have  
84 major limitations leading to the exploration of new therapeutic strategies. Studies of  
85 Dicer, an RNase III endonuclease involved in the maturation of miRNAs, suggest their  
86 importance in the development of the skeletal lineages during bone remodeling<sup>13,14</sup>.  
87 However, the specific miRNA(s) required for differentiation of osteoclasts and  
88 osteoblasts remains largely unclear. The miR-23a cluster consists of miR-23a, miR-27a,



89 and miR-24-2. Aberrant regulation of miR-23a and miR-27a has been associated with  
90 osteoporotic patients and increased bone fracture risks<sup>15, 16, 17</sup>. The effect of miR-23a and  
91 miR-27a on the differentiation of osteoblast or osteoclast cells has been shown by in vitro  
92 overexpression studies<sup>16, 18, 19</sup>. Interference of miR-23a or miR-27a by the use of  
93 inhibitor/sponge has implied their role in osteoblast and osteoclast cells<sup>18, 20</sup>. However,  
94 due to cross-reactivity of the RNA inhibitor among family members that share common  
95 seed motif<sup>21, 22</sup>, the inhibitor assay may not truthfully reflect the function of the target  
96 miRNA. Therefore, the genetic loss-of-function study remains the most rigorous method  
97 for determining the endogenous function of miR-23a and miR-27a as well as testing the  
98 removal of miR-23a~27a sufficient to cause bone loss.

99 We have performed mouse genetic analyses to definitively assess the requirement  
100 of miR-23a and miR-27a for skeletogenesis and homeostasis. Surprisingly, the skeletal  
101 phenotypes developed in newly established loss-of-function mouse models reveal  
102 findings different from previous reports based on the gain-of-function analyses. Severe  
103 loss of bone mass developed in mice with the deletion of miR-23a~27a or miR-27a.  
104 MiR-23a~27a is dispensable for osteoblast-mediated bone formation. However,  
105 compelling evidence support that miR-27a is essential for osteoclastogenesis and  
106 osteoclast-mediated bone resorption during bone remodeling. Gene expression profiling  
107 and bioinformatics analyses further identify osteoclast-specific targets of miR-27a. We  
108 demonstrated that miR-27a exerts its effects on osteoclast differentiation through  
109 modulation of a new and essential target *Sqstm1/p62*. MiR-27a is necessary and  
110 sufficient to mediate osteoclast differentiation, and as a biomarker and therapeutic target  
111 for osteoporosis.

112

## 113 **Results**

### 114 *The loss of miR23a~27a in mice causes low bone mass phenotypes*

115 To determine the requirement of miR-23a~27a for skeletal development and  
116 maintenance, we created a new mouse model with the deletion of miR-27a and miR-23a.  
117 The CRISPR/Cas9 gene edition method was used to establish the mouse strain carrying  
118 the  $\Delta$ miR-23a~27a allele (Fig. 1A). PCR analysis of the miR-23a cluster demonstrated  
119 the sgRNA-mediated deletion and the reduction of 500 bp in the wild-type to 303 bp in  
120 the mutants (Fig. 1B). Sequencing analysis also confirmed the expected genome editing  
121 (data not shown). Next, we tested if the deletions affect the expression of other  
122 microRNA molecules, generated from the same RNA precursor, within the same cluster.  
123 Semi-quantitative RT-PCR analysis revealed that only miR-23a~27a are disrupted in the  
124  $\Delta$ miR-23a~27a mutants (Fig. 1C). These results indicated our success in establishing  
125 mouse models deficient for miR-23a~27a.

126 Mice heterozygous for  $\Delta$ miR-23a~27a are viable and fertile. Intercross between  
127 the heterozygotes successfully obtained the homozygous mutants without any noticeable  
128 skeletal deformity, suggesting that miR-23a~27a are not required for the developmental  
129 processes. Next, we examined if their deletions affect homeostatic maintenance of the  
130 bone in adults. At 3 months, von Kossa staining and three-dimensional (3D) micro-  
131 computed tomography ( $\mu$ CT) analyses of the  $\Delta$ miR-23a~27a femurs revealed significant  
132 loss of the trabecular bone volume in both sexes (Fig. 1D-G; BV/TV, n=3, mean  $\pm$  SD;  
133 student t-test). Much more severe osteoporotic defects were detected in the 7-month-old  
134 mutant females of  $\Delta$ miR-23a~27a (Fig. S1; BV/TV, n=3, mean + SD; student t-test).

135 However, cortical bone thickness does not seem to be affected by the deletion of miR-  
136 23a~27a (Fig. S2). Next, we examined if similar bone loss phenotypes can be detected in  
137 the vertebrae where age-related changes in the trabecular architecture are minimal.  
138 Therefore, we examined the vertebrae of  $\Delta$ miR-23a~27a and identified drastic reductions  
139 in vertebral bone mass associated with the mutations (Fig. 1H). These data demonstrated  
140 that miR-23a~27a is required for homeostatic maintenance of the bone.

141 *Osteoblast-mediated bone formation is not affected by the loss of miR-23a~27a*

142 Proper maintenance of the skeleton requires balanced bone formation and  
143 resorption during bone remodeling. The bone loss phenotypes caused by the deletion of  
144 miR-23a~27a are likely to be associated with an imbalanced bone formation and  
145 resorption mediated by osteoblasts and osteoclasts, respectively. Therefore, we examined  
146 if the bone formation and osteoblast activities are affected by the loss of miR-23a~27a.  
147 New bone formation was analyzed by double labeling with alizarin red and calcein at 3  
148 months. Quantitative analyses did not reveal a significant difference in bone formation  
149 rate per unit of bone surface (BFR/BS) caused by the mutation (Fig. S3A). In addition,  
150 the numbers of osteoblast cells positive for type 1 collagen (Coll1) and Osteopontin  
151 (OPN) lining the trabecular bone surface remain comparable between the wild-type and  
152 homozygous littermates (Fig. S3B), indicating that osteoblast-mediated bone formation is  
153 not affected by the miR-23a~27a deletion. The results suggested that miR-27a and miR-  
154 23a are not required for osteoblastogenesis and osteoblasts-mediated bone formation.

155 *MiR-23a~27a regulates osteoclast differentiation*

156 To determine if the loss of miR-27a affects bone resorption, we first examined  
157 osteoclast number by tartrate-resistant acid phosphatase (TRAP) staining. An increase of

158 TRAP<sup>+</sup> osteoclasts was detected in the 3-month-old  $\Delta$ miR-23a~27a males and females  
159 (Fig. 2). When the number of TRAP<sup>+</sup> osteoclast cells in the total bone area (N.Oc/T.Ar),  
160 the ratio of TRAP<sup>+</sup> bone surface (Oc.S/BS), and the number of TRAP<sup>+</sup> osteoclast cells  
161 lining the bone surface (N.Oc/BS) were measured, we found that these parameters  
162 associated with bone resorption are significantly elevated in the mutants (Fig. 2; n=5,  
163 mean  $\pm$  SD; student t-test). In addition, there is a ~3-fold increase in the number of  
164 Cathepsin K-expressing osteoclast cells lining the trabecular bone surface (Fig. 2; n=5,  
165 mean  $\pm$  SD; student t-test). These results support that the loss of miR-23a~27a stimulates  
166 osteoclastogenesis, leading to an elevation of bone resorption.

167       Next, to determine the role of miR-23a~27a in osteoclastogenesis, we analyzed  
168 cell populations associated with the differentiation of the osteoclast cells. During  
169 hematopoiesis, a common myeloid progenitor gives rise to monocytes that are precursors  
170 of several cell types, including dendritic cells, macrophages, and osteoclasts<sup>23</sup>.  
171 Osteoclast precursors are known to derive from a monocyte population positive for  
172 CD11b and negative for Gr-1<sup>24</sup>. Therefore, we examined CD11b<sup>+</sup> and Gr-1<sup>-</sup> monocytes  
173 to see if the miR-23a~27a deletion affects the osteoclast precursor population. FACS  
174 analysis revealed that the CD11b<sup>+</sup> and Gr-1<sup>-</sup> population was not affected in the  $\Delta$ miR-  
175 23a~27a bone marrow of both male and female mice (Fig. 3A, B). The CD11b<sup>+</sup>/CD11c<sup>+</sup>  
176 dendritic cell population, derived from the monocytes, was also unaffected by the miR-  
177 23a~27a deletion (Fig. 3A, B). Although the precursors are not affected, miR-23a~27a  
178 may play a role in osteoclast differentiation.

179       To test osteoclast differentiation affected by the loss of miR-23a~27a, an ex vivo  
180 analysis was performed with cultures of cells seeding at two different densities. Cells

181 isolated from the bone marrow were cultured in the presence of M-CSF to obtain bone  
182 marrow-derived macrophages (BMMs), followed by differentiation into osteoclasts with  
183 the treatment of RANKL. TRAP staining was then used to assess the extent of osteoclast  
184 differentiation. The number of TRAP<sup>+</sup> cells was significantly increased by the loss of  
185 miR-23a~27a (Fig. 3C; n=5, mean  $\pm$  SD; student t-test).

### 186 *MiR-27a is an essential regulator for osteoclast-mediated skeletal remodeling*

187 Using the miRPath Reverse-Search module, we searched and ranked miRNAs  
188 whose targets are accumulated in osteoclast differentiation-related genes based on the  
189 enrichment of the targets in the Kyoto Encyclopedia of Genes and Genomics (KEGG:  
190 mmu04380)<sup>25,26</sup>. Among them, miR-27a was predicted as the top 3 candidates to  
191 regulate osteoclast differentiation (Fig. S4,  $p < 2.0 \times 10^{-71}$ ). Its sister gene miR-27b  
192 contains the same seed sequences also ranked in the top 3. However, miR-23a had a  
193 lower estimated rank suggesting that miR-27a alone may be sufficient to exert osteoclast  
194 regulation (Fig. S4,  $p < 4.9 \times 10^{-29}$ ). To test this hypothesis, we created another mouse  
195 strain with the deletion of only miR-27a using the CRISPR/Cas9 genome editing (Fig.  
196 4A). PCR analysis revealed the sgRNA-mediated deletion causes the reduction of 500 bp  
197 in the wild-type to 474 bp in the mutants (Fig. 4B). Sequencing of the PCR products  
198 confirmed the genomic deletion (data not shown). Next, semi-quantitative RT-PCR  
199 analysis indicated that only miR-27a are disrupted in the  $\Delta$ miR-27a mutants, suggesting  
200 the deletions does not affect the expression of other microRNA generated from the same  
201 RNA precursor (Fig. 4C). These results demonstrated our success in establishing mouse  
202 models deficient for miR-27a.

203 Mice heterozygous and homozygous for  $\Delta$ miR-27a are viable and fertile similar  
204 to the miR-23a~27a deletion. As anticipated, there was no noticeable skeletal deformity  
205 associated with the loss of miR-27a suggesting its dispensable role in the developmental  
206 processes. However, von Kossa staining and 3D micro-computed tomography ( $\mu$ CT)  
207 analyses of the 3-month-old male and female femurs of  $\Delta$ miR-27a revealed significant  
208 loss of the trabecular bone volume (Fig. 4D-G; BV/TV, n=3, mean  $\pm$  SD; student t-test)  
209 while cortical bone thickness was not affected (Fig. S5). Drastic bone loss phenotypes  
210 can also be detected in the  $\Delta$ miR-27a vertebrae where age-related changes in the  
211 trabecular architecture are minimal (Fig. 4H). These data demonstrated the essential role  
212 of miR-27a in skeletal remodeling.

213 Using double labeling with alizarin red and calcein for quantitative analyses, we  
214 did not reveal a significant difference in bone formation rate per unit of bone surface  
215 (BFR/BS) (Fig. S6A), and Col1<sup>+</sup> and OPN<sup>+</sup> osteoblast cells lining the trabecular bone  
216 surface (Fig. S6B) at 3 months, suggesting that osteoblast-mediated bone formation is not  
217 affected by the miR-27a deletion. However, we detected a significant increase of TRAP<sup>+</sup>  
218 and Cathepsin K-expressing osteoclast cells lining the trabecular bone surface in the 3-  
219 month-old  $\Delta$ miR-27a males and females (Fig. 5A and Fig. S7; n=5, mean  $\pm$  SD; student  
220 t-test), supporting that the loss of miR-27a stimulates osteoclastogenesis, leading to  
221 elevated bone resorption. While the CD11b<sup>+</sup>/Gr-1<sup>-</sup> and CD11b<sup>+</sup>/CD11c<sup>+</sup> osteoclast  
222 precursor populations were not affected by the miR-27a deletion (Fig. S8A, B), osteoclast  
223 differentiation was significantly increased by the loss of miR-27a (Fig. 5B; n=5, mean  $\pm$   
224 SD; student t-test). Furthermore, the loss of single miR-27a recapitulates the osteoporotic  
225 phenotypes caused by double deletion of miR-23a and miR-27a, suggesting that miR-27a

226 is responsible for skeletal maintenance through the modulation of bone remodeling  
227 processes. The results suggested that miR-27a functions as a negative regulator in  
228 osteoclast differentiation. To test this possibility, we overexpressed miR-27a in cells  
229 undergoing osteoclast differentiation. High levels of miR-27a significantly reduce the  
230 number of differentiated osteoclast cells (Fig. 5C). Our findings demonstrated that miR-  
231 27a is necessary and sufficient to modulate osteoclast differentiation. Osteoclastogenesis  
232 mediated by miR-27a is essential for bone remodeling and homeostasis.

### 233 *MiR-27a regulates osteoclast differentiation through the modulation of p62*

234 To elucidate the mechanism underlying OC differentiation regulated by miR-27a,  
235 we first used a bioinformatics approach to identify its potential targets (Fig. 6A). The  
236 TarBase computationally predicted 2312 target genes for miR-27a<sup>27</sup>. Furthermore, there  
237 were 154 genes associated with osteoclast differentiation based on the Kyoto  
238 Encyclopedia of Genes and Genomics (KEGG: mmu04380)<sup>25,26</sup>. The miRPath software  
239 further identified 26 targets overlapping with the osteoclast-related genes<sup>28</sup>. Next, we  
240 examined the transcript level of these 26 targets in wild-type and  $\Delta$ miR-27a osteoclast  
241 cells. Quantitative RT-PCR analyses revealed that 5 of these targets, Snx10, Map2k7,  
242 Ctsk, Tgfbr1, and Sqstm1, are significantly up-regulated by the loss of miR-27a (Fig. 6B,  
243  $p < 0.05$ ,  $n = 3$ ; two-sided student t-test). To test if these genes were the direct targets of  
244 miR-27a, we performed 3'UTR-reporter assays. The expression of miR-27a significantly  
245 downregulated the luciferase activity associated with the 3'UTR of Sqstm1, Tgfbr1,  
246 Snx10, Map2k7, but not Ctsk (Fig. 6C, \*,  $p < 0.01$ ,  $n=3$ , mean  $\pm$  SD; two-sided student t-  
247 test). As Cathepsin K is a protease expressed in the mature osteoclast cells, its alteration  
248 at the transcript level is likely ascribed to indirect effects of increased osteoclastogenesis

249 in  $\Delta$ miR-27a. The data indicated Sqstm1, Tgfbr1, Snx10, and Map2k7 as direct targets of  
250 miR-27a.

251 Sqstm1 also known as p62 whose gain of function mutations were linked to  
252 Paget's disease of bone with disruption of bone renewal cycle causing weakening and  
253 deformity<sup>29</sup>. The deletion of p62 in mice also impaired osteoclast differentiation<sup>30</sup>.  
254 Therefore, we performed a functional study to test the importance of the miR-27a-p62  
255 regulatory axis during osteoblastogenesis. Cells isolated from the bone marrow were  
256 induced for osteoclast differentiation and the number of osteoclast cells positive for  
257 TRAP staining was counted to determine the outcome of the differentiation. The  
258 enhanced osteoclast differentiation in the  $\Delta$ miR-27a culture was significantly alleviated  
259 by the shRNA-mediated knockdown of p62 (Fig. 6D,  $p < 0.05$ ,  $n=3$ , mean  $\pm$  SD; two-  
260 sided student t-test). The results demonstrated that miR-27a-dependent osteoclast  
261 differentiation is mediated through the regulation of p62. The miR-27a-p62 regulatory  
262 axis plays an important role in osteoclastogenesis during bone remodeling.

263

## 264 **Discussion**

265 The dysregulation of miRNA has been implicated in osteoporosis in menopausal  
266 women. Among 851 miRNAs tested miR-27a is one of the most significant genes  
267 downregulated in postmenopausal osteoporosis patients<sup>17</sup>. However, it's not clear  
268 whether the alteration of miRNAs is the cause or consequence of the disease. Our  
269 genetic study presented here has demonstrated the loss of miR23a~27a or miR27a results  
270 in significant bone loss. The findings suggest a single miRNA deficiency can lead to  
271 severe osteoporotic defects, indicating an essential role of miR-27a in bone remodeling.



272 Because osteoporosis is caused by an imbalance of osteoblast-mediated bone formation  
273 and osteoclast-mediated bone resorption, the conventional knockout model is ideal to  
274 decipher the regulatory processes underlying miR-27a-dependent pathogenesis. Our data  
275 also suggest that miR-27a is dispensable for osteoblast differentiation and bone formation  
276 as its deletion does not affect the number of osteoblast cells and bone formation rates.  
277 The results do not agree with the previous gain-of-function study indicating an inhibitory  
278 role of miR-27a in osteoblastogenesis<sup>18</sup>. Therefore, the association of osteoporosis with  
279 both upregulation and downregulation is possibly mediated through distinct mechanisms  
280 underlying the regulatory process of the miR-23a cluster.

281 This study provides compelling evidence to first demonstrate that miR-27a is  
282 essential for regulating the bone resorption process through modulation of osteoclast  
283 differentiation. The loss of miR-27a in mice leads to elevated numbers of osteoclast cells  
284 as well as increases in critical parameters for bone resorption. The inhibitory function of  
285 miR-27a on osteoclastogenesis is also in agreement with previous in vitro culture data  
286 showing its crucial downregulation among miRNAs associated with osteoclast  
287 differentiation<sup>31</sup>. Although the number of osteoclast progenitors is comparable between  
288 the control and mutant, the deletion of miR-27a strongly accelerates the process of  
289 osteoclastogenesis. The isolated  $\Delta$ miR-27a exhibits a highly potent ability in  
290 differentiation and maturation, indicating cell-autonomous regulations of miR-27a in the  
291 osteoclast cell.

292 The gain-of-function mutations have linked p62 to the cause of Paget's disease of  
293 bone – a genetic disorder characterized by aberrant osteoclastic activity<sup>29,32</sup>. The  
294 knockout of p62 in mice further supports its critical role in osteoclastogenesis<sup>29</sup>. Our

295 identification and characterization of p62 as a direct downstream regulator of miR-27a  
296 established a new osteoclast signaling axis. Not only osteoclast differentiation and  
297 maturation are suppressed by high levels of p62 but also its reduction can alleviate  
298 excessive osteoclastogenesis caused by the loss of miR-27a. Our findings suggest the  
299 miR-27a-p62 regulatory axis is necessary and sufficient to regulate bone remodeling  
300 through modulation of osteoclastogenesis. In addition, circulatory miRNAs were  
301 released in the cell-free form either bound with protein components or encapsulated with  
302 microvesicles. They are quite stable and found with variations in miRNA signature as  
303 biomarkers<sup>33</sup>. Therefore, the identification of miR-27a as essential for bone remodeling  
304 promises its use as a biomarker for early detection of bone destruction-associated  
305 diseases, risk prediction for bone fracture, as well as personalized treatment and  
306 monitoring of the treatment efficacy.

307         Hormone therapy is effective for the prevention and treatment of postmenopausal  
308 osteoporosis as estrogen reduction is a crucial pathogenic factor. Because of the well-  
309 documented side effects, e.g. cardiovascular events and breast cancer risk, estrogen-based  
310 therapies are now limited to short-term use<sup>34,35</sup>. Another widely used treatment for  
311 osteoporosis is bisphosphonates which possess a high affinity for bone minerals with  
312 inhibitory effects on osteoclast cells<sup>35,36</sup>. However, there is a need for alternative  
313 treatments due to the side effects of bisphosphonates, e.g. atypical femur fracture and  
314 osteonecrosis of the jaw<sup>36,37</sup>. The clear demonstration of osteoporotic bone loss caused  
315 by the disruption of miR-27a suggests its supplementation be explored as a new  
316 therapeutic approach. The clinical application requires a system for osteoclast delivery of  
317 miR-27a. However, this may be complicated by the negative effects of the miR23a

318 cluster on osteoblast-mediated bone formation<sup>20</sup>. High levels of miR23a in the mast  
319 cells also lead to bone loss through the release of extracellular vesicles by neoplastic mast  
320 cells<sup>38</sup>. Therefore, the targeting miR-27a to the bone resorption surfaces with synthetic  
321 compounds such as bisphosphonates or osteoclast-targeting molecules such as acid  
322 octapeptides with aspartic acid is critical for future clinical applications<sup>39</sup>.

323

## 324 **Materials and Methods**

325 **Animals.** The CRISPR/Cas9 gene edition strategy was used to generate  $\Delta miR-23a\sim 27a$   
326 and  $\Delta miR-27a$  mouse strains<sup>40, 41</sup>. Complementary oligonucleotides containing the *miR-*  
327 *23a* or *miR-27a* sgRNA target sequences were designed by CRISPR Design Tool  
328 (<http://crispr.mit.edu>) and inserted into the pX335 plasmid (Addgene, Cambridge, MA),  
329 followed by DNA sequencing to verify the correct cloning. A mixture of sgRNA  
330 plasmid, Cas9 protein (NEB, Ipswich, MA), and ssODN (Integrated DNA Technologies,  
331 Coralville, IA) was injected into the pronuclei and cytoplasm of fertilized eggs<sup>42, 43</sup>. The  
332 survived embryos were transferred into the oviduct of pseudopregnant females for  
333 carrying to term. The founder lines were genotyped by PCR analysis using primers 5'-  
334 GAC CCA GCC TGG TCA AGA TA-3' and 5'-GGA CTC CTG TTC CTG CTG AA-3'  
335 to determine the success of the gene edition and germline transmission. Both male and  
336 female mice were used in this study. Care and use of experimental animals described in  
337 this work comply with guidelines and policies of the University Committee on Animal  
338 Resources at the University of Rochester and IACUC at the Forsyth Institute.

339

340 **Genes.** Total RNAs including miRNAs were isolated using mirVana miRNA isolation  
341 kit (Thermo Fisher Scientific, Waltham, MA), followed by polyadenylation using E. coli  
342 Poly(A) polymerase (NEB), and reverse transcribed into DNA using Reverse  
343 Transcriptase (Thermo Fisher Scientific) and an anchor primer. Based on the dominant  
344 mature miRNA sequences, four to six nucleotides were added to the 5' end to enhance  
345 the annealing specificity. To detect the expression of the miRNAs, the reverse  
346 transcription products were subject to PCR analysis using forward and reverse primers  
347 listed in Supplementary Table 1. The PCR was performed by denaturation at 95<sup>0</sup>C for 2  
348 min and 27 cycles of amplification (95<sup>0</sup>C for 20 s, 60<sup>0</sup>C for 10 s, and 70<sup>0</sup>C for 10 s). The  
349 Lentivirus-miR27a (Cat #MmiR3347MR03, GeneCopoeia, Rockville, MD) and  
350 Lentivirus-shRNA p62/Sqstm1 (Product ID: MSH093992, Accession: NM\_011018.3,  
351 GeneCopoeia) were used to express miR-27a and knockdown p62, respectively.

352

353 **Cells.** Primary cells were harvested from bone marrows of the bilateral femur to obtain  
354 bone marrow cells. These cells were incubated with Mouse BD Fc Block™ (Cat  
355 #553142, BD Biosciences, San Jose, CA) to reduce non-specific antibody staining caused  
356 by receptors for IgG, followed by FACS analysis with anti-CD11b/Mac-1 (M1/70)-APC  
357 (17-0112-81, eBioscience/Thermo Fisher Scientific; 1:400), anti-granulocyte mAb: anti-  
358 Ly-6G/Gr-1 (RB6-8C5)-PE (12-5931-81, eBioscience; 1:10000), anti-dendritic cell mAb:  
359 anti-CD11c (N418)-FITC (11-0114-81, eBioscience; 1:20) using LSR II (BD  
360 Biosciences). For OC differentiation, isolated cells were cultured in αMEM containing  
361 10% FBS, 1% L-glutamine, 1% non-essential amino acids, and 5 ng/ml M-CSF, followed

362 by the addition of RANKL 10 ng/ml (R&D, Minneapolis, MN). The differentiated cells  
363 were then fixed with 10% formalin followed by TRAP staining<sup>24</sup>.

364

365 **3'UTR assay.** The LUC-3'UTR reporter DNA plasmids contain the 3'UTR from  
366 Sqstm1, Tgfbr1, Snx10, Map2k7, and Ctsk fused to the end of a luciferase reporter gene  
367 (MmiT079315-MT06, MmiT096143-MT06, MmiT073076-MT06, MmiT099033-MT06,  
368 MmiT091679-MT06, GeneCopoeia). C3H10T1/2 mesenchymal cells were transfected by  
369 the LUC-3'UTR without or with co-transfection of miR27a (MmiR3347-MR04-50,  
370 GeneCopoeia) using Lipofectamine 200 (Cat #11668027, Invitrogen, Waltham, MA).  
371 The transcript stability and its translation efficiency in the presence or absence of miR-  
372 27a were determined by the luciferase assay 72 hours after the transfection using the  
373 Dual-Luciferase Reporter Assay System (Cat #1910, Promega, Madison, WI). The  
374 luminescent intensity was measured by the SpectraMax iD3 Multi-Mode Microplate  
375 Reader (Molecular Devices, San Jose, CA). Firefly luciferase activities were normalized  
376 by the values of Renilla luciferase.

377

378 **Bone analysis and staining.** Mouse limbs and spines were collected for ex vivo  $\mu$ CT  
379 imaging using a vivaCT40 scanner (Scanco USA, Wayne, PA). The scanned images  
380 were segmented for reconstruction to access the relative bone volume (BV/TV, %) by 3-  
381 D visualization and analysis using Amira (FEI, Thermo Fisher Scientific). Cortical bone  
382 thickness (Ct. Th, mm) was analyzed at a standardized location of 30 slices near the  
383 midshaft. Skeletal preparation, fixation, and embedding for paraffin sections were  
384 performed as described<sup>44, 45, 46, 47, 48, 49, 50, 51, 52, 53</sup>. Samples were subject to

385 hematoxylin/eosin staining for histology, TRAP staining, van Kossa staining, or  
386 immunological staining with avidin: biotinylated enzyme complex<sup>44, 45, 47, 49, 50, 52, 53, 54, 55,</sup>  
387 <sup>56, 57</sup>. The immunological staining was visualized by enzymatic color reaction or  
388 fluorescence according to the manufacturer's specification (Vector Laboratories,  
389 Burlingame, CA). After TRAP staining, osteoclast number per bone area (N.Oc/T.Ar),  
390 osteoclast number per bone surface (N.Oc/BS), and osteoclast surface per bone surface  
391 (Oc.S/BS, %) was determined for statistical significance. Rabbit antibodies Collagen I  
392 (LSL-LB-1190, Cosmo Bio Co., LTD., Japan; 1:2000), Cathepsin K (ab19027, Abcam,  
393 Cambridge, MA; 1:50); mouse antibodies Osteopontin (MPIIB10, Hybridoma Bank,  
394 Iowa; 1:500) were used in these analyses. Images were taken using Leica DM2500 and  
395 DFC310FX imaging system (Leica, Bannockburn, IL) and Zeiss Axio Observer  
396 microscope (Carl Zeiss, Thornwood, NY). Bone formation rate (BFR) was examined by  
397 double labeling of Alizarin Red S and Calcein Green, injected intraperitoneally with a 7-  
398 day interval. The labeled samples were embedded without decalcification for frozen  
399 sections (SECTION-LAB Co. Ltd, Japan)<sup>47, 52, 53</sup>, followed by analyzed under a  
400 fluorescent microscope using an OsteoMeasure morphometry system (OsteoMetrics,  
401 Atlanta, GA) to determine Mineral Apposition Rate (MAR, BFR/BS).

402

403 **Statistics and Reproducibility.** Microsoft Excel 2010 was used for statistical analysis.  
404 The significance was determined by two-sided student t-tests. A *p*-value less than 0.05  
405 was considered statistically significant. Before performing the t-tests, the normality of  
406 the data distribution was first validated by the Shapiro-Wilk normality test. Analysis of  
407 samples by  $\mu$ CT was performed by a technician who is blinded to the condition. No

408 randomization, statistical method to predetermine the sample size, and  
409 inclusion/exclusion criteria defining criteria for samples were used. At least 3  
410 independent experiments were performed for statistical analyses of the animal tissues  
411 described in figure legends. Statistical data were presented as mean  $\pm$  SD. The miPath  
412 v.3 KEGG Reverse Search ([https://dianalab.e-](https://dianalab.e-ce.uth.gr/html/mirpathv3/index.php?r=mirpath/reverse)  
413 [ce.uth.gr/html/mirpathv3/index.php?r=mirpath/reverse](https://dianalab.e-ce.uth.gr/html/mirpathv3/index.php?r=mirpath/reverse)) with Search Pathway: mmu04380  
414 and Method: TarBase v7.0 was used to identify the candidates that are both miR-27a  
415 targets (TarBase v7.0) and genes associated with osteoclast differentiation (KEGG:  
416 mmu04380).

417

418 **Materials & Correspondence.** Correspondence and material requests should be  
419 addressed to W.H. and T.M.

420

#### 421 **ACKNOWLEDGEMENTS**

422 We thank Chyuan-Sheng Lin, Keiko Kaneko, Ya-Hui Chiu, Michael Thullen, and Hsiao-  
423 Man Ivy Yu for assistance in transgenic mouse strains, plasmid DNA construction and  
424 purification, FACS,  $\mu$ CT scanning, and imaging analysis, respectively. Research  
425 reported in this publication is supported by the National Institute of Dental and  
426 Craniofacial Research of the National Institutes of Health under award numbers  
427 R01DE015654 and R01DE026936 to W.H. and R21DE028696 to T.M.

428

429

## 430 References

- 431 1. Bartel DP. MicroRNAs: genomics, biogenesis, mechanism, and function. *Cell*  
432 **116**, 281-297 (2004).  
433
- 434 2. Baek D, Villen J, Shin C, Camargo FD, Gygi SP, Bartel DP. The impact of  
435 microRNAs on protein output. *Nature* **455**, 64-71 (2008).  
436
- 437 3. Hausser J, Zavolan M. Identification and consequences of miRNA-target  
438 interactions--beyond repression of gene expression. *Nat Rev Genet* **15**, 599-612  
439 (2014).  
440
- 441 4. Stark A, Brennecke J, Bushati N, Russell RB, Cohen SM. Animal MicroRNAs  
442 confer robustness to gene expression and have a significant impact on 3'UTR  
443 evolution. *Cell* **123**, 1133-1146 (2005).  
444
- 445 5. Ebert MS, Sharp PA. Roles for microRNAs in conferring robustness to biological  
446 processes. *Cell* **149**, 515-524 (2012).  
447
- 448 6. Li Z, Rana TM. Therapeutic targeting of microRNAs: current status and future  
449 challenges. *Nat Rev Drug Discov* **13**, 622-638 (2014).  
450
- 451 7. Miska EA, *et al.* Most *Caenorhabditis elegans* microRNAs are individually not  
452 essential for development or viability. *PLoS genetics* **3**, e215 (2007).  
453
- 454 8. Park CY, *et al.* A resource for the conditional ablation of microRNAs in the  
455 mouse. *Cell reports* **1**, 385-391 (2012).  
456
- 457 9. Croce CM. Causes and consequences of microRNA dysregulation in cancer. *Nat*  
458 *Rev Genet* **10**, 704-714 (2009).  
459
- 460 10. Shenoy A, Blelloch RH. Regulation of microRNA function in somatic stem cell  
461 proliferation and differentiation. *Nature reviews* **15**, 565-576 (2014).  
462
- 463 11. Manolagas SC, Jilka RL. Bone marrow, cytokines, and bone remodeling.  
464 Emerging insights into the pathophysiology of osteoporosis. *N Engl J Med* **332**,  
465 305-311 (1995).  
466
- 467 12. Feng X, McDonald JM. Disorders of bone remodeling. *Annu Rev Pathol* **6**, 121-  
468 145 (2011).  
469
- 470 13. Gaur T, *et al.* Dicer inactivation in osteoprogenitor cells compromises fetal  
471 survival and bone formation, while excision in differentiated osteoblasts increases  
472 bone mass in the adult mouse. *Developmental biology* **340**, 10-21 (2010).  
473



- 474 14. Mizoguchi F, *et al.* Osteoclast-specific Dicer gene deficiency suppresses  
475 osteoclastic bone resorption. *Journal of cellular biochemistry* **109**, 866-875  
476 (2010).  
477
- 478 15. Seeliger C, *et al.* Five freely circulating miRNAs and bone tissue miRNAs are  
479 associated with osteoporotic fractures. *J Bone Miner Res* **29**, 1718-1728 (2014).  
480
- 481 16. Guo Q, Chen Y, Guo L, Jiang T, Lin Z. miR-23a/b regulates the balance between  
482 osteoblast and adipocyte differentiation in bone marrow mesenchymal stem cells.  
483 *Bone Res* **4**, 16022 (2016).  
484
- 485 17. You L, Pan L, Chen L, Gu W, Chen J. MiR-27a is Essential for the Shift from  
486 Osteogenic Differentiation to Adipogenic Differentiation of Mesenchymal Stem  
487 Cells in Postmenopausal Osteoporosis. *Cell Physiol Biochem* **39**, 253-265 (2016).  
488
- 489 18. Hassan MQ, *et al.* A network connecting Runx2, SATB2, and the miR-  
490 23a~27a~24-2 cluster regulates the osteoblast differentiation program.  
491 *Proceedings of the National Academy of Sciences of the United States of America*  
492 **107**, 19879-19884 (2010).  
493
- 494 19. Guo L, *et al.* Estrogen inhibits osteoclasts formation and bone resorption via  
495 microRNA-27a targeting PPARgamma and APC. *J Cell Physiol* **234**, 581-594  
496 (2018).  
497
- 498 20. Zeng HC, *et al.* MicroRNA miR-23a cluster promotes osteocyte differentiation by  
499 regulating TGF-beta signalling in osteoblasts. *Nature communications* **8**, 15000  
500 (2017).  
501
- 502 21. Androsavich JR, *et al.* Polysome shift assay for direct measurement of miRNA  
503 inhibition by anti-miRNA drugs. *Nucleic acids research* **44**, e13 (2016).  
504
- 505 22. Ebert MS, Neilson JR, Sharp PA. MicroRNA sponges: competitive inhibitors of  
506 small RNAs in mammalian cells. *Nature methods* **4**, 721-726 (2007).  
507
- 508 23. Charles JF, Nakamura MC. Bone and the innate immune system. *Curr*  
509 *Osteoporos Rep* **12**, 1-8 (2014).  
510
- 511 24. Yao Z, *et al.* Tumor necrosis factor-alpha increases circulating osteoclast  
512 precursor numbers by promoting their proliferation and differentiation in the bone  
513 marrow through up-regulation of c-Fms expression. *J Biol Chem* **281**, 11846-  
514 11855 (2006).  
515
- 516 25. Kanehisa M, Goto S. KEGG: kyoto encyclopedia of genes and genomes. *Nucleic*  
517 *acids research* **28**, 27-30 (2000).  
518

- 519 26. Kanehisa M, *et al.* KEGG for linking genomes to life and the environment.  
520 *Nucleic acids research* **36**, D480-484 (2008).  
521
- 522 27. Vlachos IS, *et al.* DIANA-TarBase v7.0: indexing more than half a million  
523 experimentally supported miRNA:mRNA interactions. *Nucleic acids research* **43**,  
524 D153-159 (2015).  
525
- 526 28. Vlachos IS, *et al.* DIANA-miRPath v3.0: deciphering microRNA function with  
527 experimental support. *Nucleic acids research* **43**, W460-466 (2015).  
528
- 529 29. Rea SL, *et al.* A novel mutation (K378X) in the sequestosome 1 gene associated  
530 with increased NF-kappaB signaling and Paget's disease of bone with a severe  
531 phenotype. *J Bone Miner Res* **21**, 1136-1145 (2006).  
532
- 533 30. Duran A, *et al.* The atypical PKC-interacting protein p62 is an important mediator  
534 of RANK-activated osteoclastogenesis. *Developmental cell* **6**, 303-309 (2004).  
535
- 536 31. Ma Y, *et al.* Validation of downregulated microRNAs during osteoclast formation  
537 and osteoporosis progression. *Mol Med Rep* **13**, 2273-2280 (2016).  
538
- 539 32. Laurin N, Brown JP, Morissette J, Raymond V. Recurrent mutation of the gene  
540 encoding sequestosome 1 (SQSTM1/p62) in Paget disease of bone. *Am J Hum*  
541 *Genet* **70**, 1582-1588 (2002).  
542
- 543 33. Garnero P. Biomarkers for osteoporosis management: utility in diagnosis, fracture  
544 risk prediction and therapy monitoring. *Mol Diagn Ther* **12**, 157-170 (2008).  
545
- 546 34. Rossouw JE, *et al.* Risks and benefits of estrogen plus progestin in healthy  
547 postmenopausal women: principal results From the Women's Health Initiative  
548 randomized controlled trial. *Jama* **288**, 321-333 (2002).  
549
- 550 35. Khosla S, Hofbauer LC. Osteoporosis treatment: recent developments and  
551 ongoing challenges. *Lancet Diabetes Endocrinol* **5**, 898-907 (2017).  
552
- 553 36. Russell RG, Watts NB, Ebtino FH, Rogers MJ. Mechanisms of action of  
554 bisphosphonates: similarities and differences and their potential influence on  
555 clinical efficacy. *Osteoporos Int* **19**, 733-759 (2008).  
556
- 557 37. Shane E, *et al.* Atypical subtrochanteric and diaphyseal femoral fractures: second  
558 report of a task force of the American Society for Bone and Mineral Research. *J*  
559 *Bone Miner Res* **29**, 1-23 (2014).  
560
- 561 38. Kim DK, *et al.* Mastocytosis-derived extracellular vesicles deliver miR-23a and  
562 miR-30a into pre-osteoblasts and prevent osteoblastogenesis and bone formation.  
563 *Nature communications* **12**, 2527 (2021).  
564

- 565 39. Dang L, *et al.* Targeted Delivery Systems for Molecular Therapy in Skeletal  
566 Disorders. *International journal of molecular sciences* **17**, 428 (2016).  
567
- 568 40. Cong L, *et al.* Multiplex genome engineering using CRISPR/Cas systems. *Science*  
569 (*New York, NY* **339**, 819-823 (2013)).  
570
- 571 41. Mali P, *et al.* RNA-guided human genome engineering via Cas9. *Science (New*  
572 *York, NY* **339**, 823-826 (2013)).  
573
- 574 42. Mashiko D, Fujihara Y, Satouh Y, Miyata H, Isotani A, Ikawa M. Generation of  
575 mutant mice by pronuclear injection of circular plasmid expressing Cas9 and  
576 single guided RNA. *Scientific reports* **3**, 3355 (2013).  
577
- 578 43. Wu WH, *et al.* CRISPR Repair Reveals Causative Mutation in a Preclinical  
579 Model of Retinitis Pigmentosa. *Molecular therapy : the journal of the American*  
580 *Society of Gene Therapy* **24**, 1388-1394 (2016).  
581
- 582 44. Maruyama T, Mirando AJ, Deng CX, Hsu W. The balance of WNT and FGF  
583 signaling influences mesenchymal stem cell fate during skeletal development. *Sci*  
584 *Signal* **3**, ra40 (2010).  
585
- 586 45. Yu HM, *et al.* The role of Axin2 in calvarial morphogenesis and craniosynostosis.  
587 *Development (Cambridge, England)* **132**, 1995-2005 (2005).  
588
- 589 46. Mirando AJ, Maruyama T, Fu J, Yu HM, Hsu W. Beta-catenin/cyclin D1  
590 mediated development of suture mesenchyme in calvarial morphogenesis. *BMC*  
591 *Dev Biol* **10**, 116 (2010).  
592
- 593 47. Maruyama T, Jiang M, Hsu W. Gpr177, a novel locus for bone mineral density  
594 and osteoporosis, regulates osteogenesis and chondrogenesis in skeletal  
595 development. *J Bone Miner Res* **28**, 1150-1159 (2013).  
596
- 597 48. Yu HM, Jin Y, Fu J, Hsu W. Expression of Gpr177, a Wnt trafficking regulator,  
598 in mouse embryogenesis. *Dev Dyn* **239**, 2102-2109 (2010).  
599
- 600 49. Yu HM, Liu B, Chiu SY, Costantini F, Hsu W. Development of a unique system  
601 for spatiotemporal and lineage-specific gene expression in mice. *Proceedings of*  
602 *the National Academy of Sciences of the United States of America* **102**, 8615-8620  
603 (2005).  
604
- 605 50. Yu HM, Liu B, Costantini F, Hsu W. Impaired neural development caused by  
606 inducible expression of Axin in transgenic mice. *Mechanisms of development* **124**,  
607 146-156 (2007).  
608

- 609 51. Maruyama EO, Yu HM, Jiang M, Fu J, Hsu W. Gpr177 deficiency impairs  
610 mammary development and prohibits Wnt-induced tumorigenesis. *PLoS ONE* **8**,  
611 e56644 (2013).  
612
- 613 52. Maruyama T, Jeong J, Sheu TJ, Hsu W. Stem cells of the suture mesenchyme in  
614 craniofacial bone development, repair and regeneration. *Nature communications*  
615 **7**, 10526 (2016).  
616
- 617 53. Maruyama T, *et al.* Rap1b is an effector of Axin2 regulating crosstalk of signaling  
618 pathways during skeletal development. *J Bone Miner Res*, (2017).  
619
- 620 54. Chiu SY, Asai N, Costantini F, Hsu W. SUMO-Specific Protease 2 Is Essential  
621 for Modulating p53-Mdm2 in Development of Trophoblast Stem Cell Niches and  
622 Lineages. *PLoS biology* **6**, e310 (2008).  
623
- 624 55. Fu J, Hsu W. Epidermal Wnt controls hair follicle induction by orchestrating  
625 dynamic signaling crosstalk between the epidermis and dermis. *J Invest Dermatol*  
626 **133**, 890-898 (2013).  
627
- 628 56. Russell HK, Jr. A modification of Movat's pentachrome stain. *Archives of*  
629 *pathology* **94**, 187-191 (1972).  
630
- 631 57. Fu J, *et al.* Disruption of SUMO-Specific Protease 2 Induces Mitochondria  
632 Mediated Neurodegeneration. *PLoS genetics* **10**, e1004579 (2014).  
633  
634
- 635
- 636
- 637

638 **Figure legends**

639 Fig. 1. Low bone mass phenotypes in mice deficient for miR-23a~27a. (A) Diagrams  
640 illustrate the miR-23a cluster, consisting of miR-23a, miR-27a, and miR-24-2 (WT), and  
641 the creation of mouse strains deficient for miR-23a~27a ( $\Delta$ miR-23a~27a) by  
642 CRISPR/Cas9 genome editing. Broken lines and arrows indicate the deleted genomic  
643 regions and primers used for PCR genotyping analysis, respectively. (B) PCR analysis  
644 examines the miR-23a cluster for genotyping the wild-type (+/+), heterozygous (+/-) and  
645 homozygous (-/-) for miR-23a~27a mice. The mutant ( $\Delta$ ) alleles with deletion of miR-  
646 23a~27a result in the generation of shorter PCR products. (C) RT-PCR analysis of the  
647 miR-23a, miR-27a, and miR-24-2 RNAs reveals the disruption of specific microRNA(s)  
648 in the mutants. The analysis of small noncoding RNA U6 is used as an internal control.  
649 Femurs of the 3-month-old (3M) wild-type (+/+) and mutant (-/-) males and females were  
650 analyzed by  $\mu$ CT scanning (E-F), followed by sectioning and von Kossa staining (D).  
651 Reconstructed  $\mu$ CT images of the distal femur (E) and femoral metaphysis (F) were  
652 subject to quantitative analysis for trabecular bone volume (G). (H) Spines of the 3-  
653 month-old (3M)  $\Delta$ miR-23a~27a males and females were analyzed by  $\mu$ CT scanning.  
654 Images show the  $\mu$ CT scanned wild-type (+/+) and mutant (-/-) L5 vertebrae (top) and 3D  
655 rendered trabecular bone (bottom). Quantitative analyses of trabecular bone volume per  
656 total volume in the femurs and vertebrates are shown in graphs (BV/TV, n=3, mean  $\pm$   
657 SD; student t-test). Images (D-F, H) are representatives of three independent  
658 experiments. Scale bars, 500  $\mu$ m (D-F, H).  
659

660 Fig. 2. Increased number of osteoclast cells in the  $\Delta$ miR-23a~27a mice. Sections of the  
661 3-month-old (3M)  $\Delta$ miR-23a~27a males and females were analyzed by tartrate-resistant  
662 acid phosphatase (TRAP) staining and immunostaining of Cathepsin K (CTSK). Graphs  
663 show quantitative analyses of positively stained cells in the wild-type (+/+) and mutant (-  
664 /-) distal femurs (No. of cell+/BS, n=5, mean  $\pm$  SD; student t-test). Histomorphometric  
665 parameters of bone resorption are evaluated by number of osteoclast/bone area  
666 (N.OC/T.Ar), osteoclast surface/bone surface (OC.S/BS), osteoclast number/bone surface  
667 (N.OC/BS, n=5, mean  $\pm$  SD; student t-test). Images are representatives of five  
668 independent experiments. Scale bars, 100  $\mu$ m.

669

670 Fig. 3. MiR-23a~27a regulates osteoclast differentiation. (A) FACS analysis examines  
671 the CD11b+/Gr-1- and CD11b+/CD11c+ populations for monocyte precursors and  
672 dendritic cells, respectively. Images are representatives of three independent  
673 experiments. (B) The bone marrow of 3-month-old (3M) wild-type (+/+) and  $\Delta$ miR-  
674 23a~27a (-/-) males and females show no significant difference (ns; n = 3, mean  $\pm$  SD;  
675 student t-test). (C) Cells isolated from the bone marrow were induced for osteoclast (OC)  
676 differentiation (top,  $2.5 \times 10^4$  cells/well and bottom,  $5 \times 10^4$  cells/well). The number of OC  
677 cells positive for TRAP staining is significantly enhanced in the mutant cultures (n=5,  
678 mean  $\pm$  SD; student t-test). Scale bars, 1 mm (C).

679

680 Fig. 4. The loss of miR-27a alone causes osteoporotic defects. (A) Diagrams illustrate  
681 the miR-23a cluster (WT), and the creation of mouse strains deficient for miR-27a  
682 ( $\Delta$ miR-27a) by CRISPR/Cas9 genome editing. Broken lines and arrows indicate the

683 deleted genomic regions and primers used for PCR genotyping analysis, respectively.  
684 (B) PCR-based genotyping identifies the wild-type (+/+), heterozygous (+/-) and  
685 homozygous (-/-) for miR-27a mice showing the mutant ( $\Delta$ ) alleles with deletion of miR-  
686 27a result in the generation of shorter PCR products. (C) RT-PCR analysis reveals the  
687 disruption of miR-27a but not miR-23a and miR-24-2 RNAs in  $\Delta$ miR-27a mutants. The  
688 analysis of small noncoding RNA U6 is used as an internal control. Femurs of the 3-  
689 month-old (3M) wild-type (+/+) and mutant (-/-) males and females were analyzed by  
690  $\mu$ CT scanning (E-F), followed by sectioning and von Kossa staining (D). The 3D  
691 rendered  $\mu$ CT images of the distal femur (E) and femoral metaphysis (F) were subject to  
692 quantitative analysis for trabecular bone volume (G). (H) Spines of the 3-month-old  
693 (3M)  $\Delta$ miR-27a males and females were analyzed by  $\mu$ CT scanning. Images show the  
694  $\mu$ CT scanned wild-type (+/+) and mutant (-/-) L5 vertebrae (top) and 3D rendered  
695 trabecular bone (bottom). Quantitative analyses of trabecular bone volume per total  
696 volume in the femurs and vertebrates are shown in graphs (BV/TV, n=3, mean  $\pm$  SD;  
697 student t-test). Images (D-F, H) are representatives of three independent experiments.  
698 Scale bars, 500  $\mu$ m (D-F, H).

699

700 Fig. 5. MiR-27a is necessary and sufficient to repress osteoclast differentiation. (A)  
701 Graphs show quantitative analyses of TRAP+ and CTST+ cells in the wild-type (+/+) and  
702 mutant (-/-) distal femurs detected in the stained section of the 3-month-old (3M)  $\Delta$ miR-  
703 27a males and females (n=5, mean  $\pm$  SD; student t-test). Histomorphometric parameters  
704 of bone resorption are evaluated by number of osteoclast/bone area (N.OC/T.Ar),  
705 osteoclast surface/bone surface (OC.S/BS), osteoclast number/bone surface (N.OC/BS),



706 CTSK+ cells/bone surface (No. CTSK+/BS). (B) Cells isolated from the wild-type (+/+)  
707 and mutant (-/-) bone marrows were induced for osteoclast (OC) differentiation (top,  
708  $2.5 \times 10^4$  cells/well and bottom,  $5 \times 10^4$  cells/well). Graphs indicate the number of TRAP+  
709 OC cells (n=5, mean  $\pm$  SD; student t-test). (C) Cells isolated from the bone marrow were  
710 seeded ( $5 \times 10^4$  cells/well) and induced for OC differentiation with the lentivirus-mediated  
711 expression of GFP (control) or miR-27a. The TRAP+ OC cell number is significantly  
712 decreased in the miR-27 overexpression cultures (n=3,  $p < 0.05$ , mean  $\pm$  SD; student t-  
713 test). Scale bars, 1 mm (B, C).

714

715 Fig. 6. MiR-27a-dependent regulation of osteoclast differentiation is mediated through  
716 p62 modulation. (A) Venn diagrams illustrate our strategy to identify the OC  
717 differentiation-associated genes (KEGG: mmu04380) that are directly regulated by miR-  
718 27a. (B) The twenty-six potential targets are examined by quantitative RT-PCR analysis  
719 to detect the change of transcript levels in wild-type and  $\Delta$ miR-27a OC cells (n=3; \*,  $p$ -  
720 value  $< 0.05$ , two-sided student's t-test). (C) The 3'UTR-reporter assay examines five  
721 potential genes that are direct targets of miR-27a (n=3; \*,  $p$ -value  $< 0.01$ , means  $\pm$  SEM,  
722 two-sided student's t-test). (D) A functional study of Sqstm1 also known as p62 reveals  
723 the enhancement of OC differentiation caused by the loss of miR-27a is alleviated by  
724 lentiviral-shRNA-mediated knockdown. TRAP staining examines the number of mature  
725 OC cells in the control,  $\Delta$ miR-27a and  $\Delta$ miR-27a plus shRNA-mediated knockdown of  
726 p62 ( $\Delta$ miR-27a + p62 shRNA) cultures (n=3; \*,  $p$ -value  $< 0.05$ , means  $\pm$  SEM, two-sided  
727 student's t-test). Scale bars, 500  $\mu$ m.



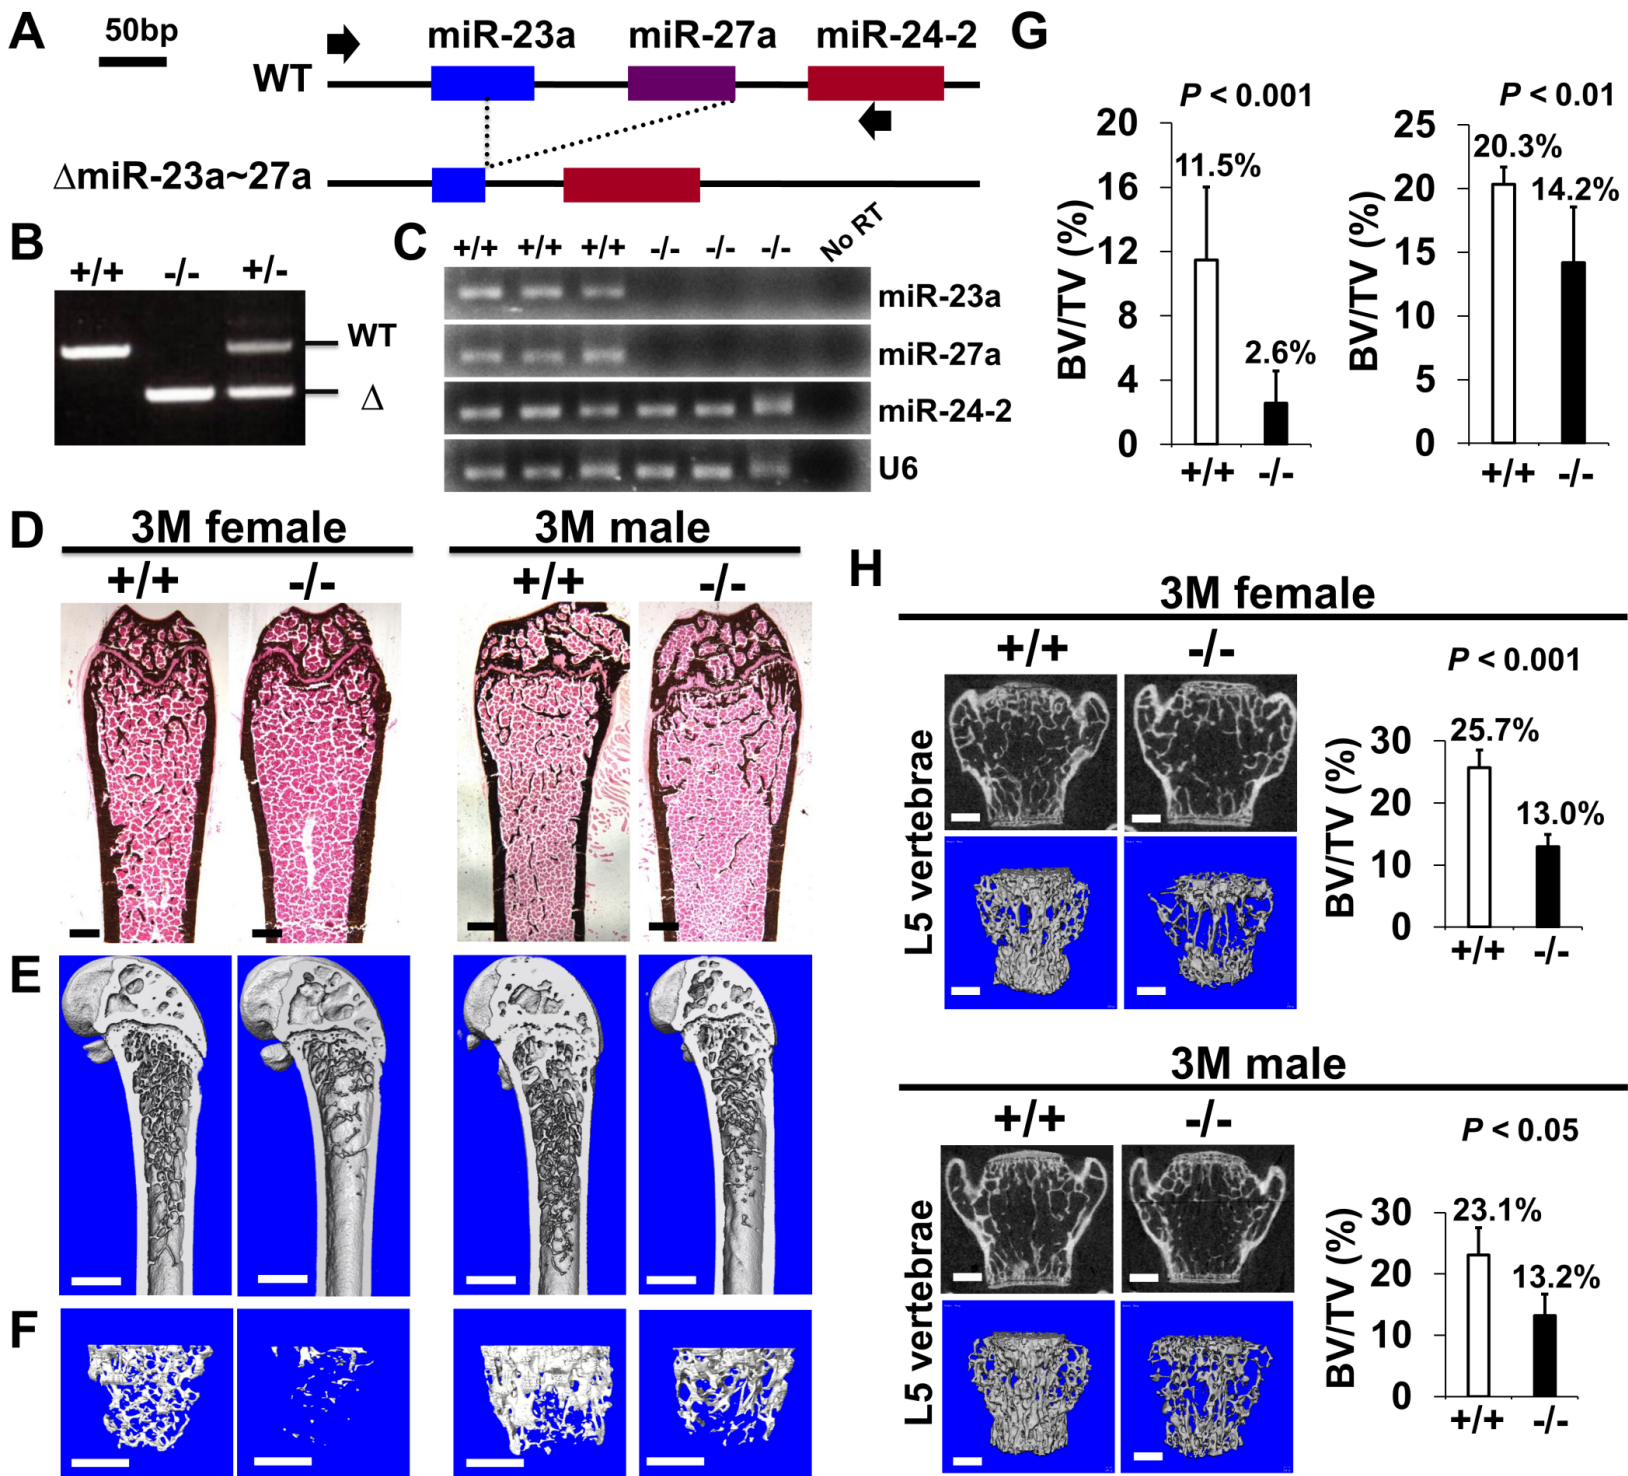

## $\Delta$ miR-23a~27a

3M female

3M male

TRAP

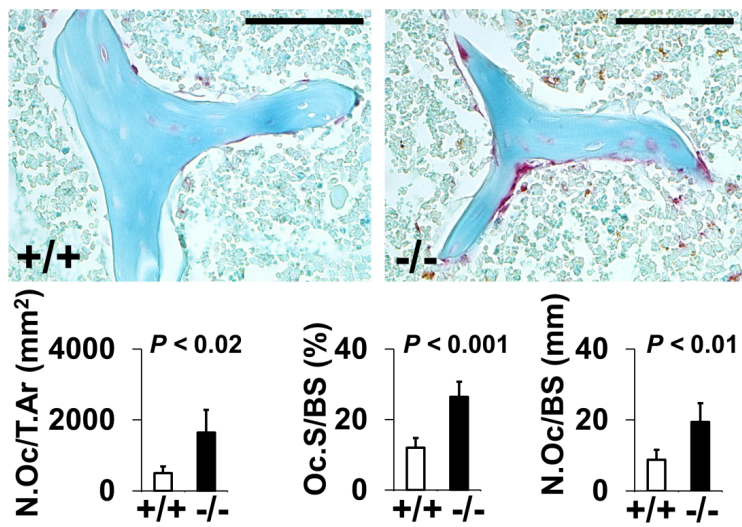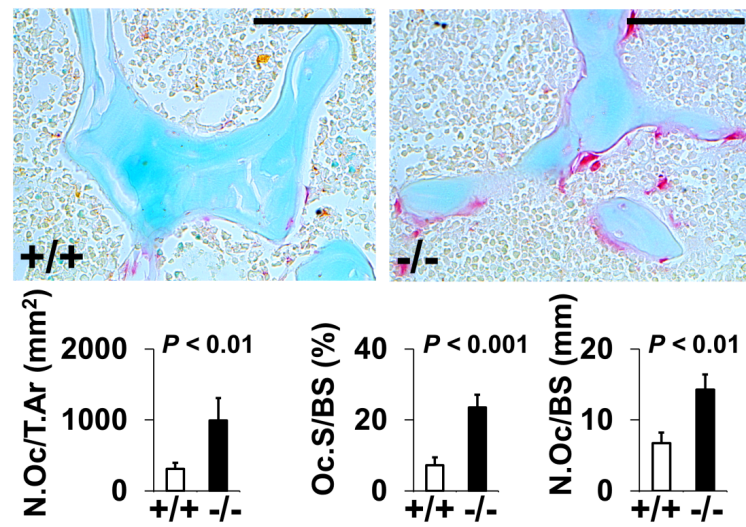

CTSK

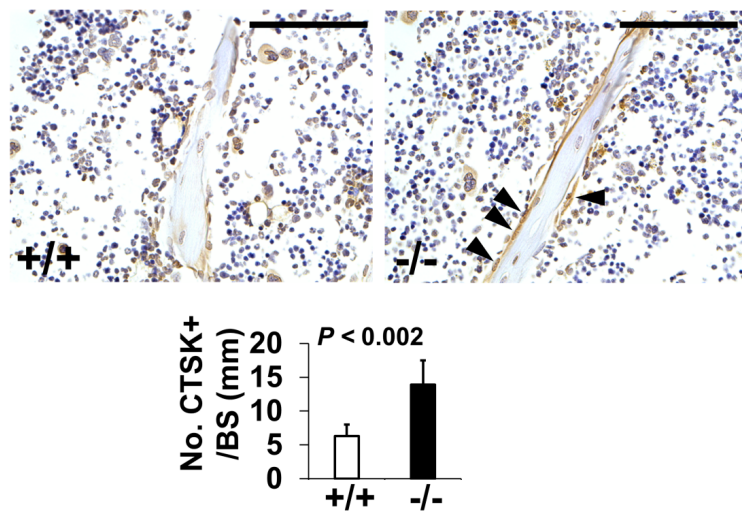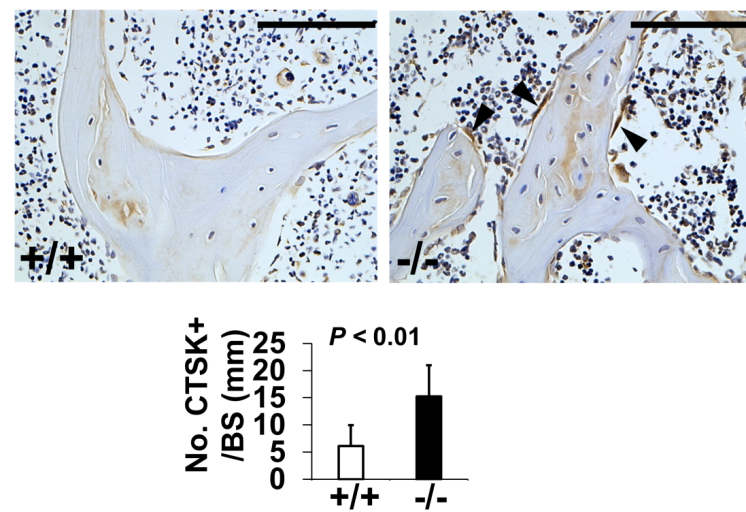



$\Delta$ miR-23a~27a

3M female

3M male

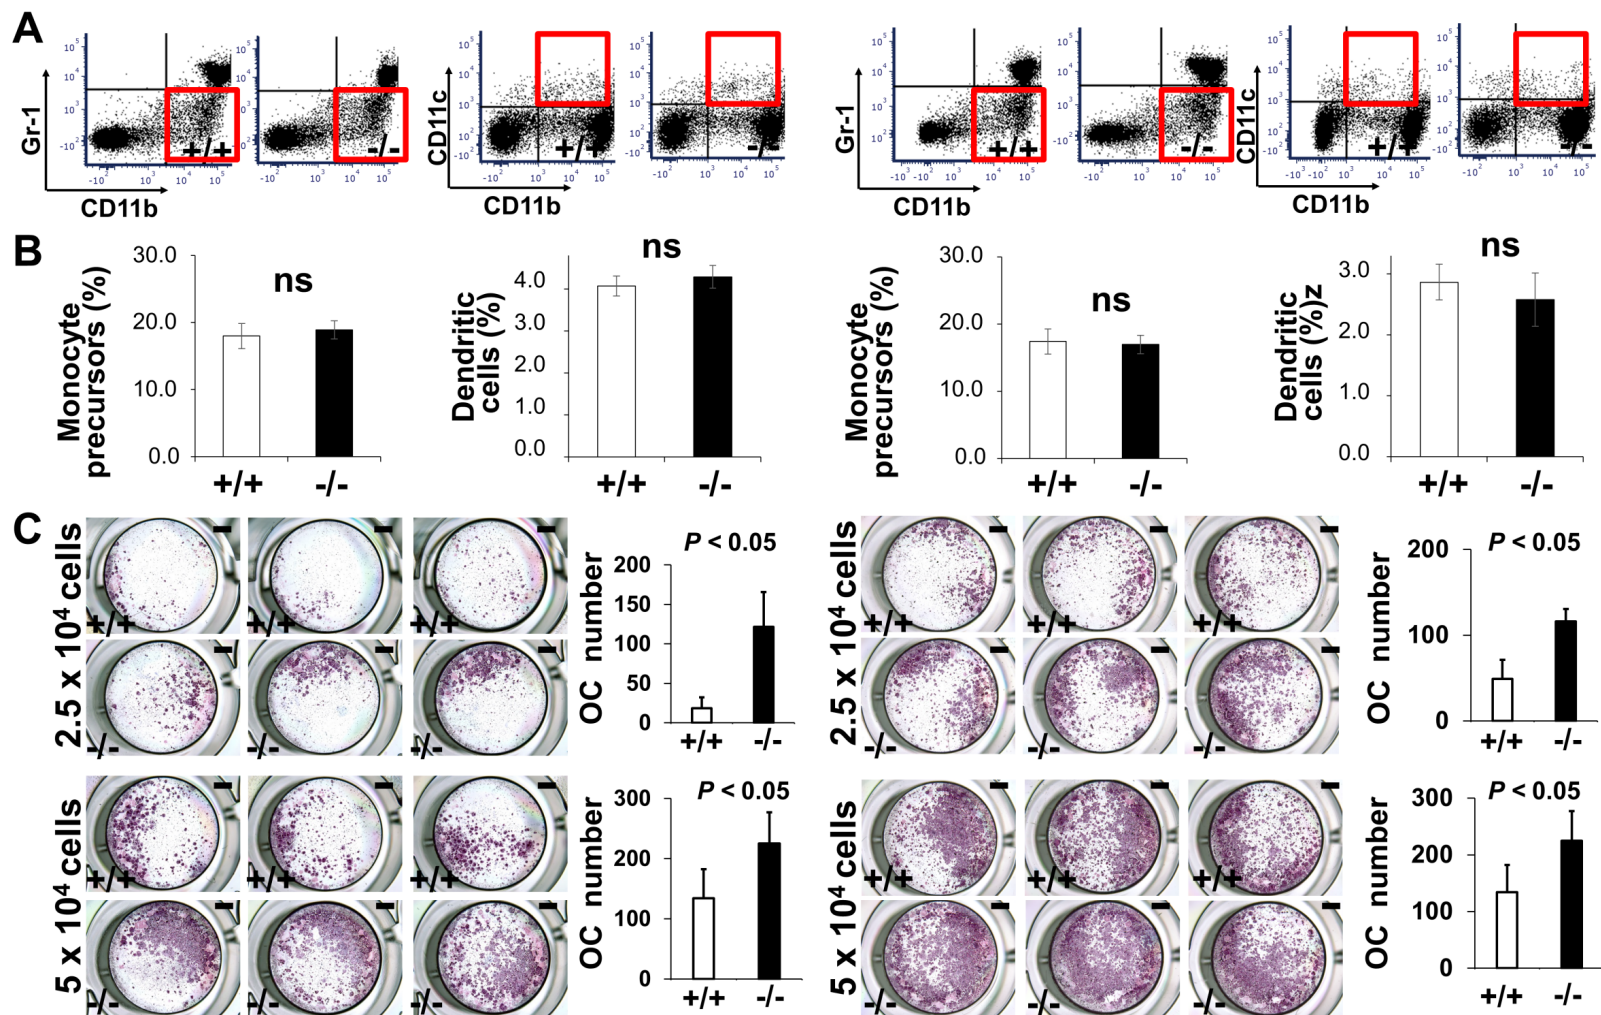

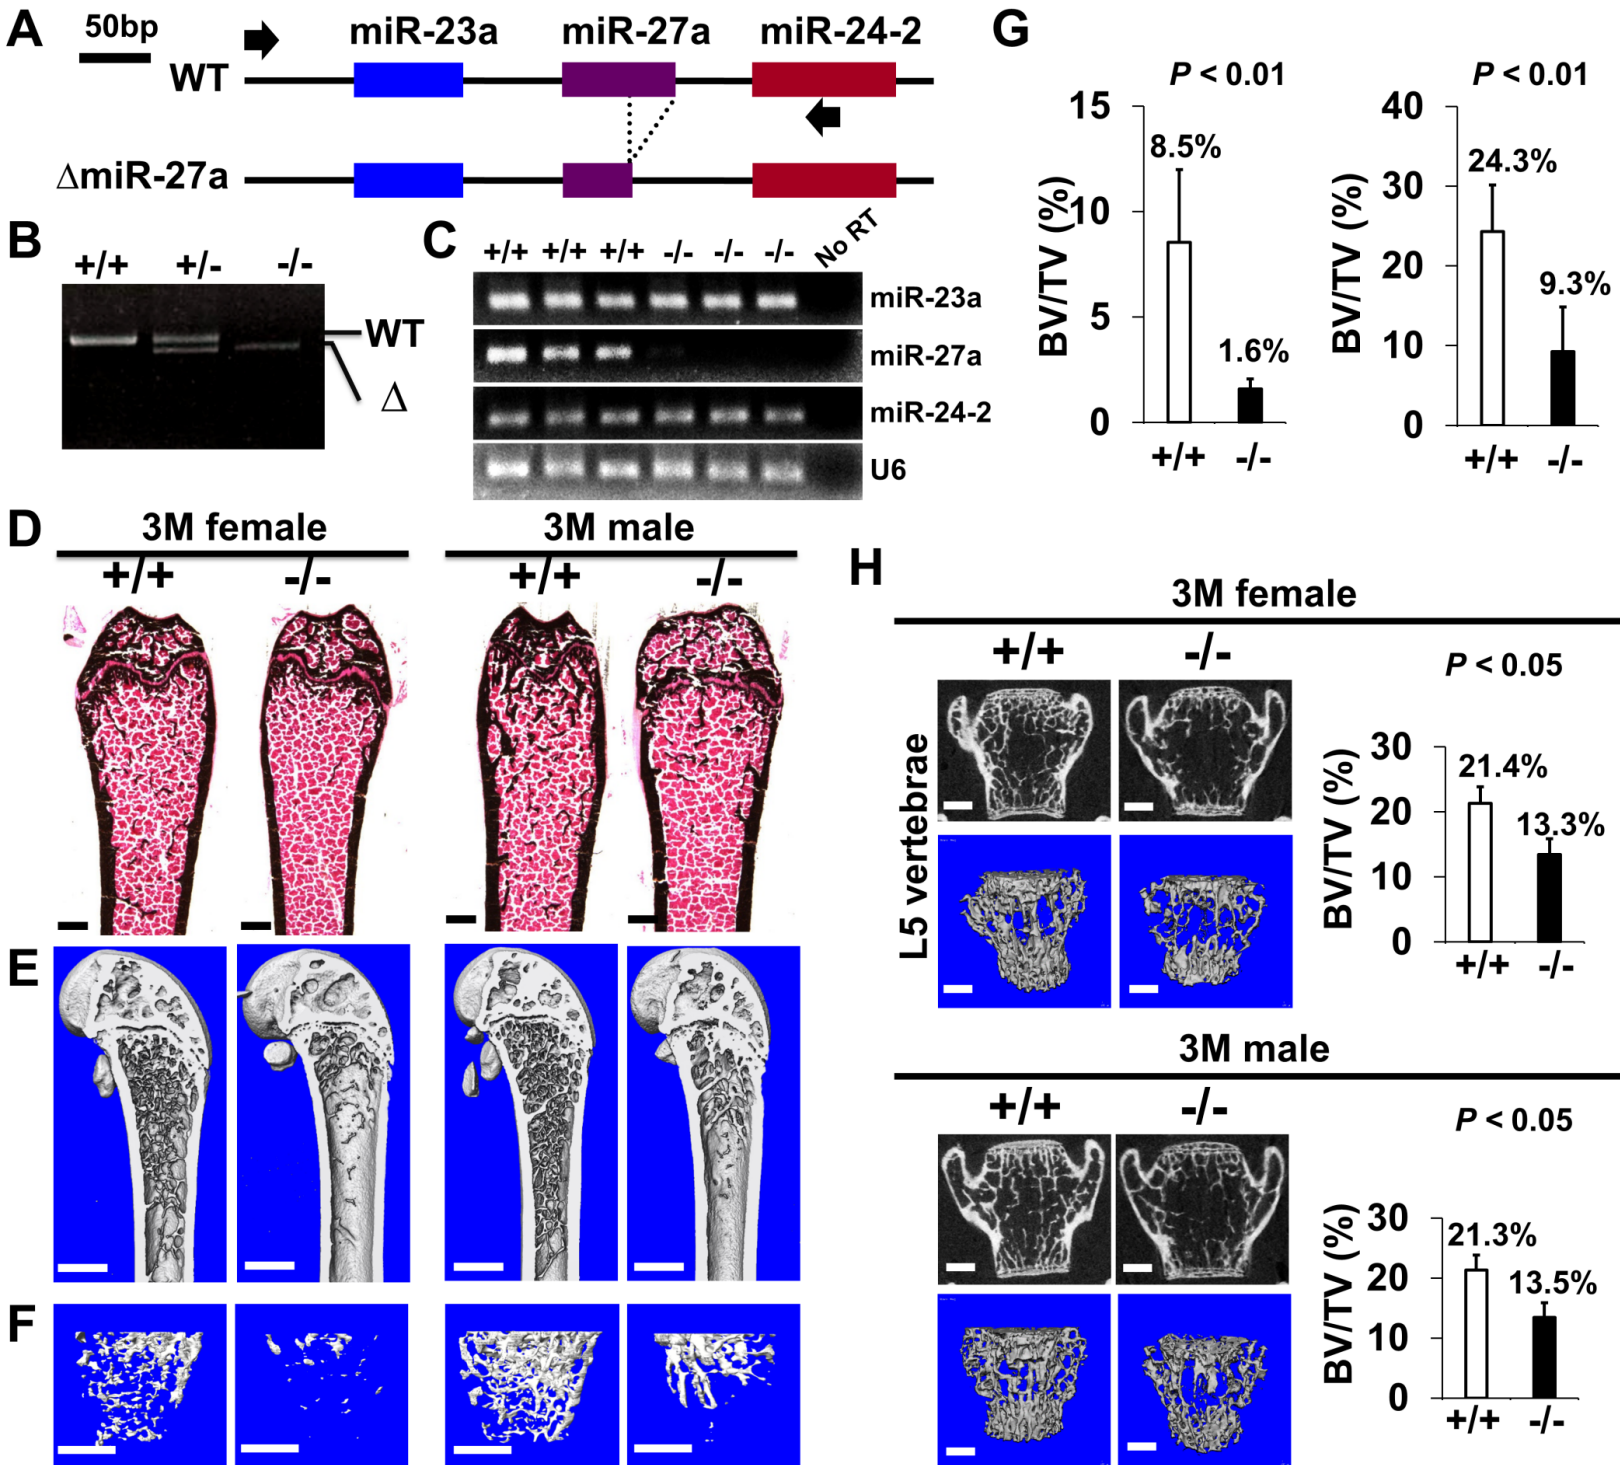

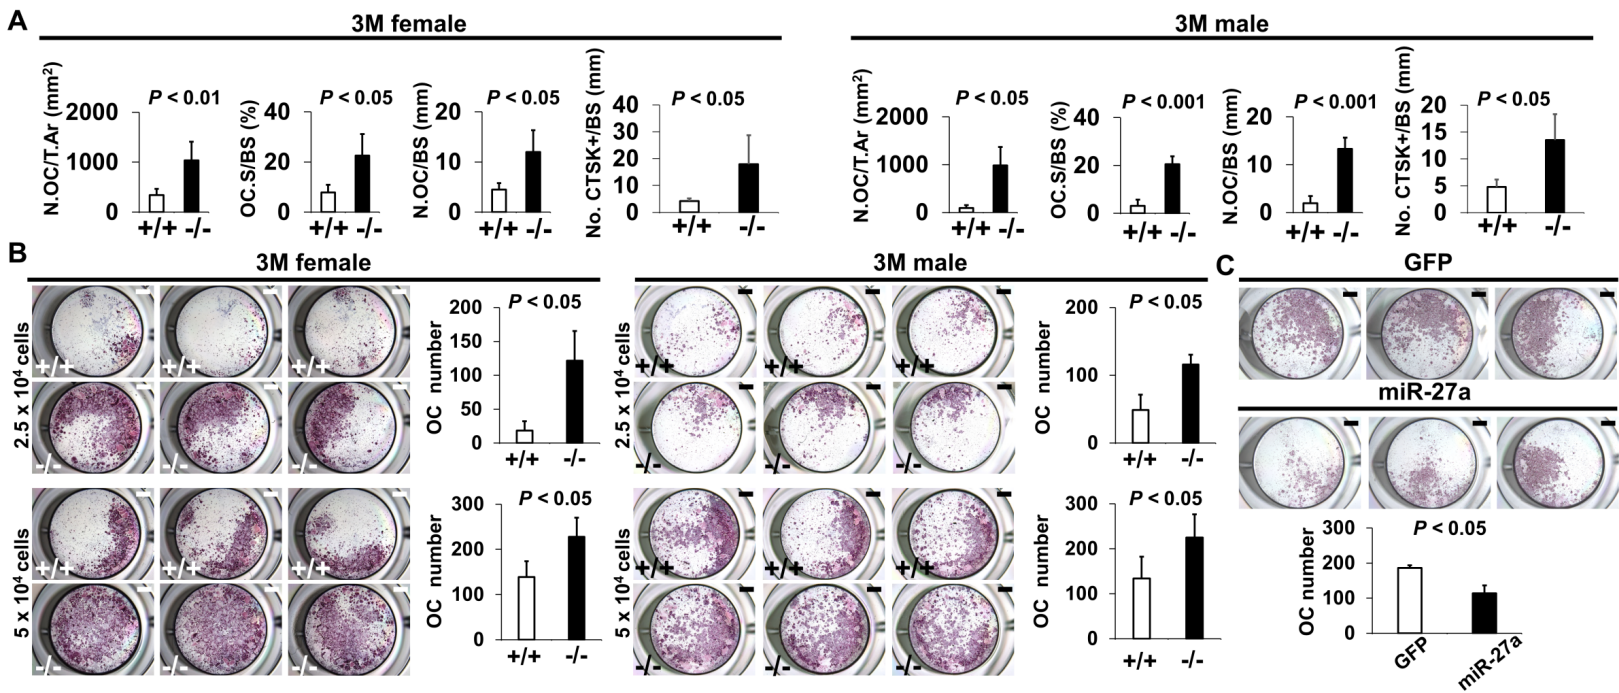



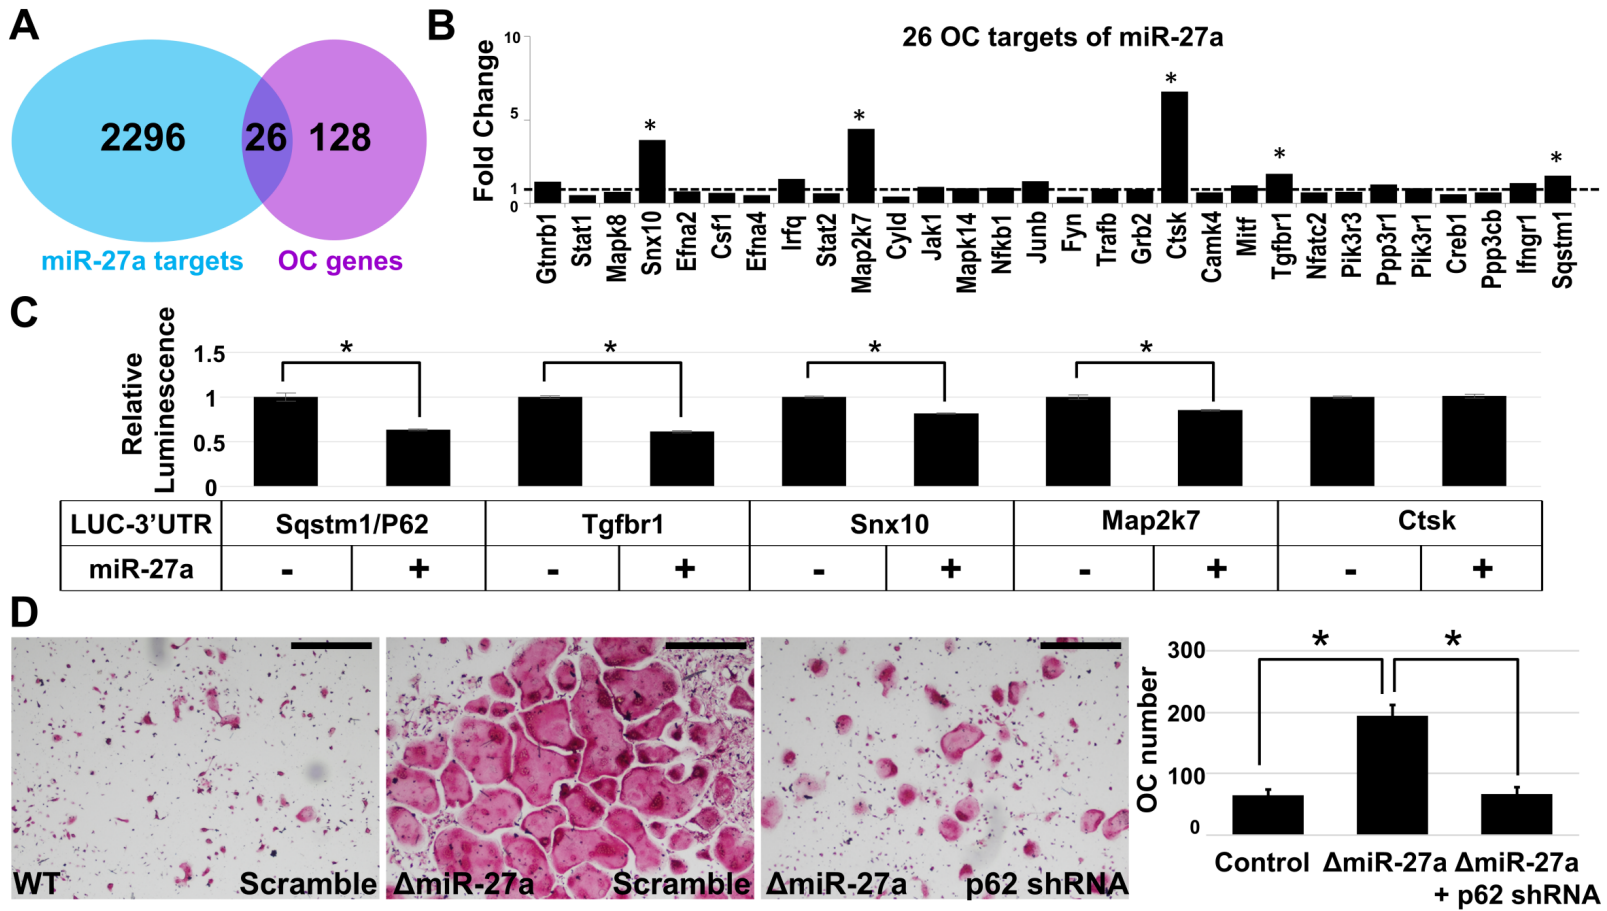

## Supplementary Information for

# MicroRNA-27a is essential for bone remodeling by modulating p62-mediated osteoclast signaling

Shumin Wang<sup>1</sup>, Eri O Maruyama<sup>2</sup>, John Martinez<sup>1</sup>, Trunee Hsu<sup>6</sup>, Wencheng Wu<sup>1</sup>, Wei Hsu<sup>1,2,3,4,5,\*</sup> and Takamitsu Maruyama<sup>1,2,\*</sup>

\*Corresponding authors emails

[wei.hsu@hsdm.harvard.edu](mailto:wei.hsu@hsdm.harvard.edu); [whsu@forsyth.org](mailto:whsu@forsyth.org); [tmaruyama@forsyth.org](mailto:tmaruyama@forsyth.org)

### The PDF file includes:

- Fig. S1. The loss of miR-23a~27a causes an osteopenic phenotype in mice.
- Fig. S2. The loss of miR-23a~27a does not affect the cortical bone thickness.
- Fig. S3. Bone formation and osteoblastogenesis are not affected by the  $\Delta$ miR-23a~27a deletion.
- Fig. S4. Identification of miRNA candidates in osteoclast differentiation pathway.
- Fig. S5. The loss of miR-27a does not affect the cortical bone thickness.
- Fig. S6. Bone formation and osteoblastogenesis are not affected by the  $\Delta$ miR-27a deletion.
- Fig. S7. Enhanced osteoclastogenesis in the  $\Delta$ miR-27a mice.
- Fig. S8. Osteoclast precursor populations are not affected by the loss of miR-27a.
- Table S1. Primers for RT-PCR analysis of miR23a~27a~24-2.

Fig. S1. The loss of miR-23a~27a causes an osteopenic phenotype in mice. Femurs of the 7-month-old (7M) wild-type (+/+ ) and mutant (-/-) females, were analyzed by  $\mu$ CT scanning, followed by H&E staining (A). The 3D rendering  $\mu$ CT images of the distal femur (B) and femoral metaphysis (C) were subject to quantitative analysis (D) for BV/TV (trabecular bone volume per tissue volume, n=3, \*, p-value < 0.05, mean  $\pm$  SD; student t-test). Scale bars, 500  $\mu$ m (A-C).

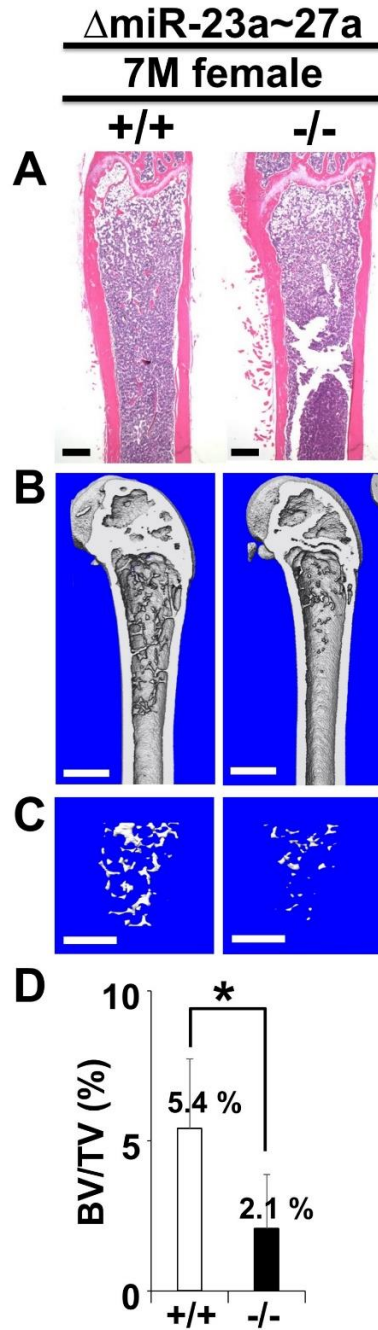



Fig. S2. The loss of miR-23a~27a does not affect the cortical bone thickness. Femurs of the 3-month-old (3M)  $\Delta$ miR-23a~27a males and females were analyzed by  $\mu$ CT scanning. Images show the reconstructed cortical bone of wild-type (+/+) and mutant (-/-). Quantitative analyses of cortical (Ct.) thickness (Th) are shown in graphs (n=5, mean  $\pm$  SD; student t-test, ns, non-significant). Images are representatives of five independent experiments. Scale bars, 500  $\mu$ m.

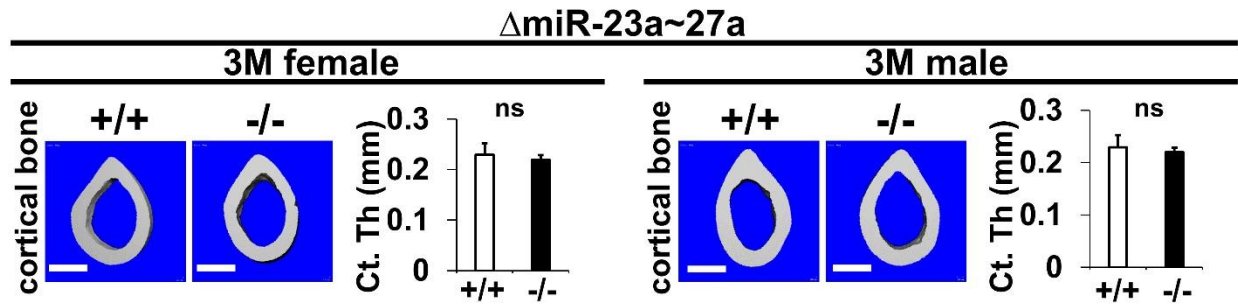

Fig. S3. Bone formation and osteoblastogenesis are not affected by the  $\Delta$ miR-23a~27a deletion. Sections of the 3-month-old (3M)  $\Delta$ miR-23a~27a males and females were analyzed by (A) double labeling of alizarin red and calcein, and (B) immunostaining of type 1 collagen (Col1) and Osteopontin (OPN). Quantitative analyses of (A) bone formation rate per bone surface (BFR/BS,  $n=3$ , mean  $\pm$  SD; student t-test) and (B) number of positively stained cells over the bone surface (No. +/BS,  $n=5$ , mean  $\pm$  SD; student t-test, ns, non-significant) in the wild-type (+/+) and mutant (-/-) distal femurs are shown in graphs. Eb, endosteal; Tb, trabecular. Images are representatives of three independent experiments. Scale bar, 100  $\mu$ m.

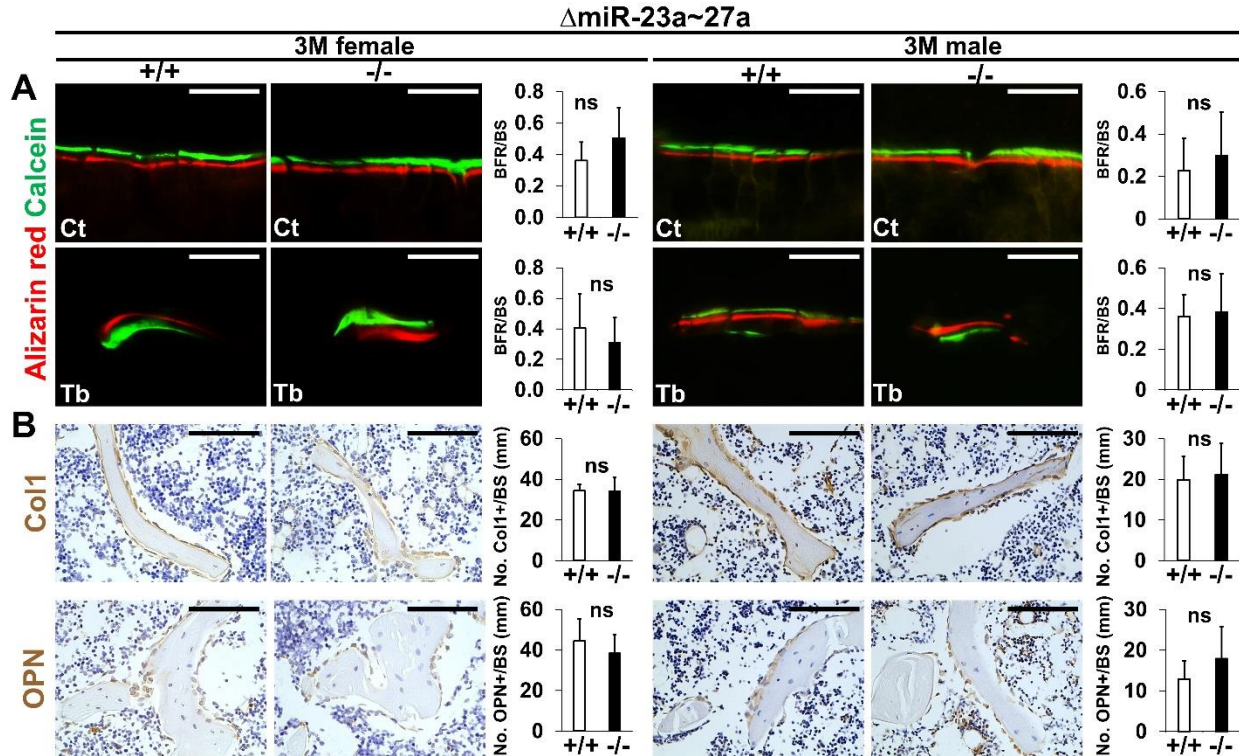

Fig. S4. Identification of miRNA candidates in osteoclast differentiation pathway. The diagram illustrates the top candidates identified by the miRPath Reverse-Search module based on the target accumulation in osteoclast differentiation-related genes in the Kyoto Encyclopedia of Genes and Genomics (KEGG: mmu04380).

| <b>RANK</b> | <b>miRNA</b>     | <b>p-value</b> | <b>Genes targeted</b> |
|-------------|------------------|----------------|-----------------------|
| 1           | mmu-miR-17-5p    | 2.97E-81       | 29                    |
| 2           | mmu-miR-27b-3p   | 1.13E-74       | 27                    |
| 3           | mmu-miR-27a-3p   | 2.01E-71       | 26                    |
| 4           | mmu-miR-20b-5p   | 2.02E-71       | 26                    |
| 5           | mmu- miR-106a-5p | 3.37E-68       | 25                    |
| ↓           | ↓                | ↓              | ↓                     |
| 50          | mmu-miR-23a-3p   | 4.98E-29       | 12                    |

Fig. S5. The loss of miR-27a does not affect the cortical bone thickness. Femurs of the 3-month-old (3M) and  $\Delta$ miR-27a males and females were analyzed by  $\mu$ CT scanning. Images show the reconstructed cortical bone of wild-type (+/+) and mutant (-/-). Quantitative analyses of cortical (Ct.) thickness (Th) are shown in graphs (n=5, mean  $\pm$  SD; student t-test, ns, non-significant). Images are representatives of five independent experiments. Scale bars, 500  $\mu$ m.

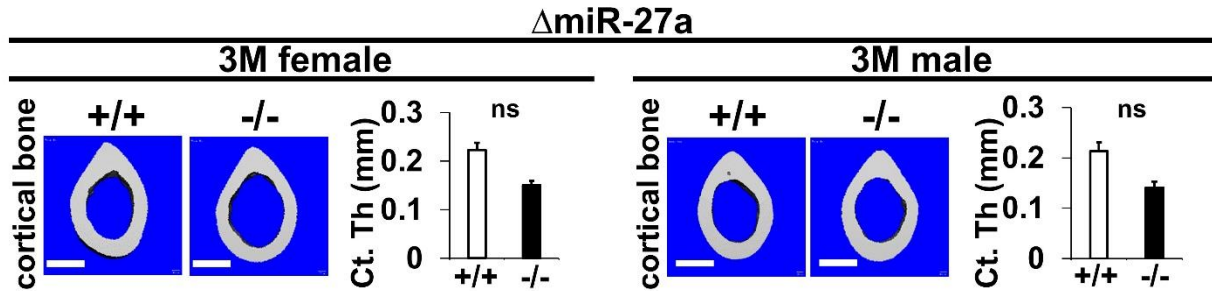

Fig. S6. Bone formation and osteoblastogenesis are not affected by the  $\Delta$ miR-27a deletion. Sections of the 3-month-old (3M)  $\Delta$ miR-27a males and females were analyzed by (A) double labeling of alizarin red and calcein, and (B) immunostaining of type 1 collagen (Col1) and Osteopontin (OPN). Quantitative analyses of (A) bone formation rate per bone surface (BFR/BS,  $n=3$ , mean  $\pm$  SD; student t-test) and (B) number of positively stained cells over the bone surface (No. +/BS,  $n=5$ , mean  $\pm$  SD; student t-test, ns, non-significant) in the wild-type (+/+) and mutant (-/-) distal femurs are shown in graphs. Eb, endosteal; Tb, trabecular. Images are representatives of three independent experiments. Scale bar, 100  $\mu$ m.

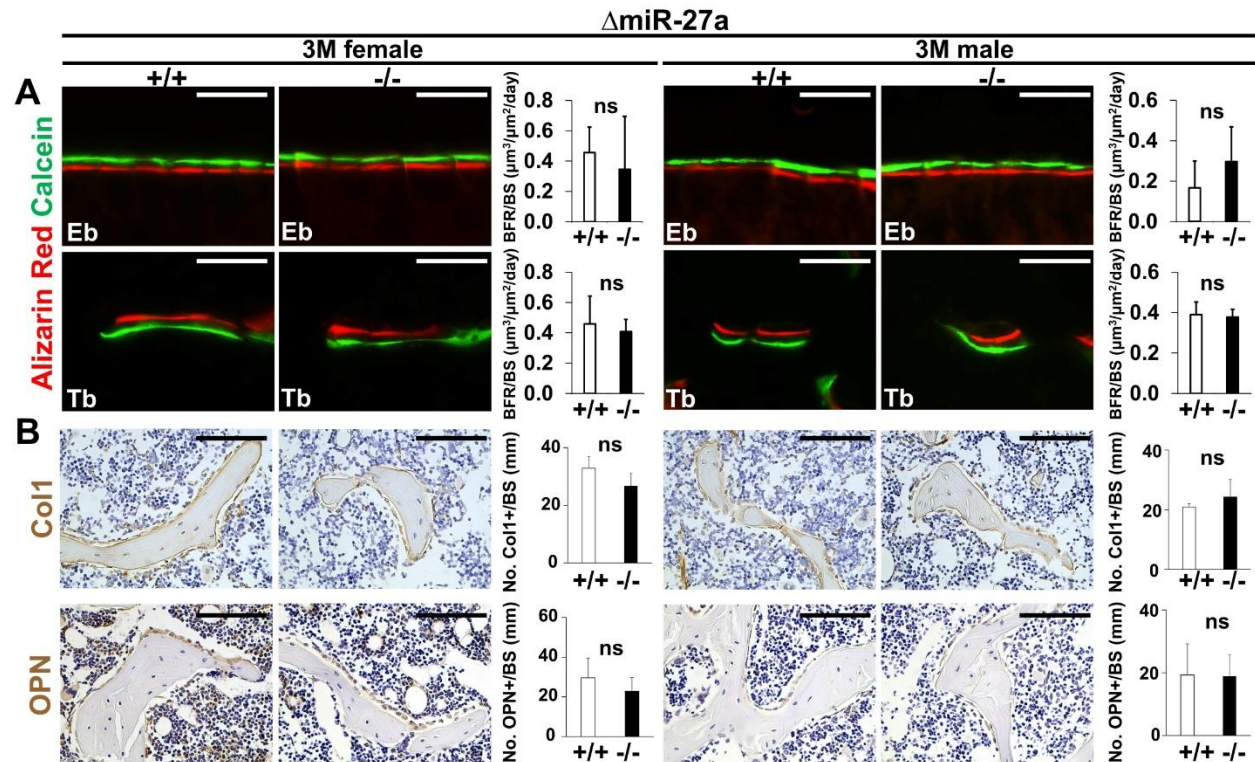



Fig. S7. Enhanced osteoclastogenesis in the  $\Delta$ miR-27a mice. Sections of the 3-month-old (3M)  $\Delta$ miR-27a males and females were analyzed by tartrate-resistant acid phosphatase (TRAP) staining and immunostaining of Cathepsin K (CTSK). Based on the positively stained cells in the wild-type (+/+) and mutant (-/-) distal femurs (No. +/BS, n=5, mean  $\pm$  SD; student t-test), quantitative analyses were performed to obtain histomorphometric parameters of bone resorption, the number of osteoclast/bone area (N.Oc/T.Ar), osteoclast surface/bone surface (Oc.S/BS), Osteoclast number/bone surface (N.Oc/BS) shown in Fig. 5. Arrowheads indicate differentiated osteoclast cells positive for TRAP and CTSK. Images are representatives of five independent experiments. Scale bars, 100  $\mu$ m.

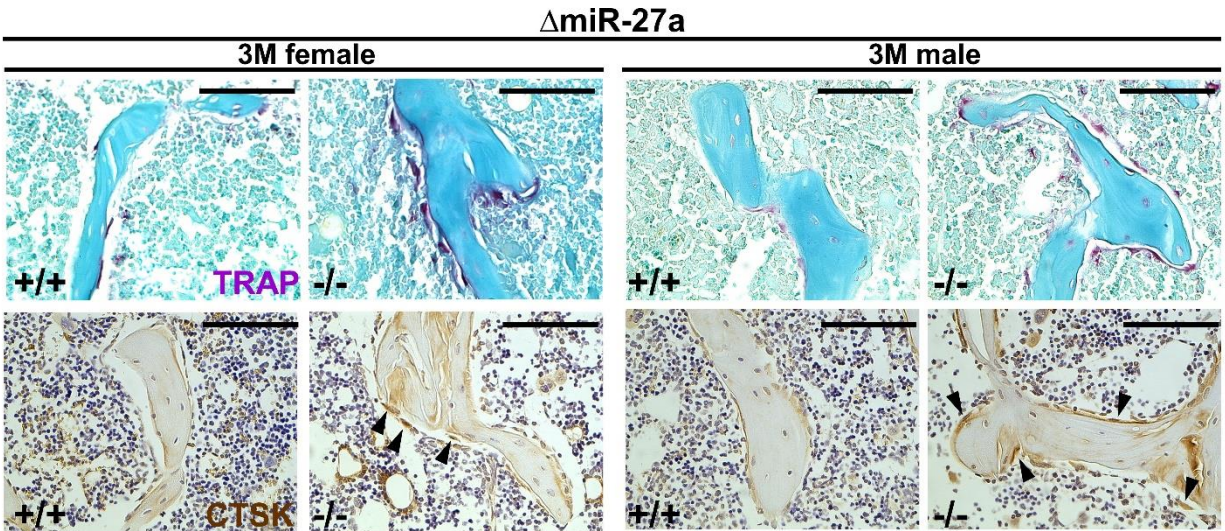

Fig. S8. Osteoclast precursor populations are not affected by the loss of miR-27a. (A) FACS analysis examines the CD11b<sup>+</sup>/Gr-1<sup>-</sup> and CD11b<sup>+</sup>/CD11c<sup>+</sup> populations for monocyte precursors and dendritic cells, respectively. Images are representatives of three independent experiments. (B) No significant difference in the bone marrow of 3-month-old (3M) wild-type (+/+) and  $\Delta$ miR-23a~27a (-/-) mice (n = 3, mean  $\pm$  SD; student t-test).

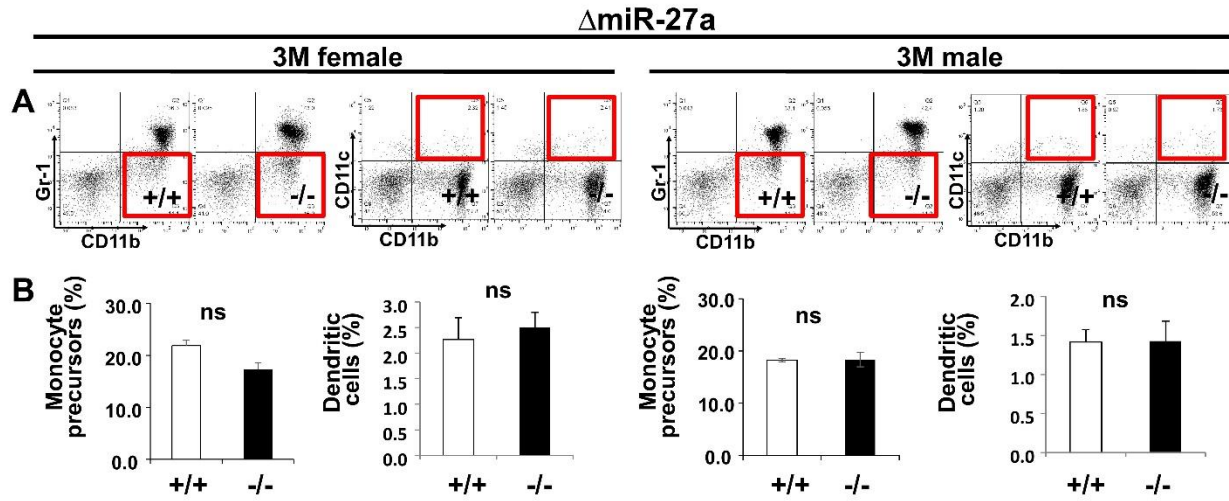

Table S1. Primers for RT-PCR analysis of miR23a~27a~24-2.

| Name                         | Primer                                                         |
|------------------------------|----------------------------------------------------------------|
| mmu-miR-23a F                | GTCTGATCACATTGCCAGGGATTTC                                      |
| mmu-miR-27a F                | GTCTTACAGTGGCTAAGTTCCGC                                        |
| mmu-miR-24-2 F               | GTGGCTCAGTTCAGCAGGAACAG                                        |
| U6 polyA F                   | CACGCAAATTCGTGAAGCGTTCCAT                                      |
| universal reverse PCR primer | CCAGTCTCAGGGTCCGAGGTATTC<br>CGACTCGATCCAGTCTCAGGGTCCGAGGTATTCG |
| miR reverse anchor primer    | ATCCTAACCTCTCCTCGGTATCGAGTCGCACTTT<br>TTTTTTTTTV               |
